# Supplementary material
Source: PubMed Central journal article supplement (PMC8669604)
Supplement: jamainternmed-e217009-s001.pdf [file jamainternmed-e217009-s001.pdf]

## Supplementary Online Content

Willem van Dalen J, Brayne C, Crane PK, et al. Association of systolic blood pressure with dementia risk and the role of age, U-shaped associations, and mortality. *JAMA Intern Med*. Published online December 13, 2021. doi:10.1001/jamainternmed.2021.7009

**eMethods 1.** Study Recruitment

**eMethods 2.** Dementia Ascertainment and Follow-up in Participating Studies

**eMethods 3.** Models and Model Selection

**eMethods 4.** Interpretation of Confidence Intervals

**eMethods 5.** Choice of Age-Bands and Shift in Analysis

**eFigure 1.** Participants per 5-Year Age Categories per Study

**eFigure 2.** Percentage Contribution per Study per 5-Year Age Category

**eTable 1.** Relations for Diastolic Blood Pressure With Risk of Dementia, Mortality, and Dementia/Mortality

**eTable 2.** Complete Results Comparing Linear and Non-Linear Models for Systolic Blood Pressure

**eTable 3.** Complete Results Comparing Linear and Non-Linear Models for Diastolic Blood Pressure

**eFigure 3.** Relations Between Diastolic Blood Pressure and Risk of Dementia/Mortality Combined

**eTable 4.** Relations for Systolic Blood Pressure With Risk of Dementia, Mortality, and Dementia/Mortality in Age Groups, Stratified According to Antihypertensive Medication (AHM) Use

**eTable 5.** Relations for Diastolic Blood Pressure With Risk of Dementia, Mortality, and Dementia/Mortality in Age Groups, Stratified According to Antihypertensive Medication (AHM) Use

**eFigure 4.** Analyses of Systolic and Diastolic Blood Pressure and Dementia/Mortality Risk Adjusted and Not Adjusted for Potentially Relevant Confounders

**eTable 6.** Model Improvement Stratified According to Subgroups

**eTable 7.** Subgroup Analyses in Individuals With/Without a History of Stroke

**eTable 8.** Leave-One-Out Analyses

**eTable 9.** Relations for Systolic and Diastolic Blood Pressure With Risk of Dementia, Mortality, and Dementia/Mortality According to Time to Event in the Total Population and Within Age Subgroups

**eFigure 5.** Analyses for Systolic Blood Pressure According to Time to Event in the Total Population and Within Age Subgroups

**eTable 10.** Sensitivity Analyses Adjusting for Multiple Confounders in Together in Single Models

**eTable 11.** Results for Fine-Gray Analyses of Dementia Accounting for the Competing Risk of Mortality in the Overall Population and Baseline Age Groups

This supplementary material has been provided by the authors to give readers additional information about their work.

## **eMethods 1. Study Recruitment**

We included population-based prospective longitudinal cohort studies in older people designed to evaluate incident dementia, from the 21<sup>st</sup> century EURODEM consortium. Four out of nine eligible cohorts could not participate, reasons being 1.) uncertainty regarding potential legal issues with off-site data sharing due to new European privacy regulations, 2.) insufficient time/manpower to comply with the data request, partly due to pressures from the Corona virus pandemic. Because the combined population of the four participating EURODEM studies was relatively limited to comprehensively assess the study's research question in detail with sufficient power over a broad age-range, we consulted our authors' personal networks to recruit additional population-based longitudinal cohort studies, specifically designed to study incident dementia in community-dwelling older people, that would meet inclusion criteria, and be able to provide data readily available for analysis on very short notice. This led to the inclusion of the preDIVA and ACT studies.

## **eMethods 2. Dementia Ascertainment and Follow-up in Participating Studies**

### **LEILA75+:**

The Leipzig Longitudinal Study of the Aged (LEILA 75+) is a population-based prospective study of older adults in Leipzig, Germany. At baseline (1997), 1,692 subjects aged 75+ were enrolled: 1,500 through systematic random sampling from an age-ordered list provided by the local registry office, and 192 institutionalized participants as population representative proportion. During the baseline visit, face-to-face interviews were conducted by trained physicians and psychologists at the participants' homes. With regard to cognitively impaired participants, additional structured third-party interviews were conducted with proxies. Follow-up interviews were carried out for all eligible participants every 1.5 years during the study period of 8 years.

Cognitive status was assessed with the 30 items of the Mini-Mental State Examination (MMSE). Dementia was with the SIDAM (Structured Interview for Diagnosis of Dementia of Alzheimer type, Multi-infarct Dementia and Dementia of other Aetiology) according to DSM-IV criteria. The SIDAM comprises a cognitive test battery and a section for clinical judgement and third-party information on psychosocial impairment, including a scale for the assessment of activities of daily living with 14 items (SIDAM-ADL scale). The cognitive test battery consists of 55 items, including the 30 items of the MMSE. The criteria of a full work up of the SIDAM were an MMSE score lower than 24, and at least two impairment in the SIDAM-ADL scale. If it was not possible to administer the SIDAM at a follow-up assessment (e.g. because of death or severe weakness), a comprehensive structured proxy interview was offered including the Clinical Dementia Rating Scale (CDR). For each subject, consensus conferences of physicians and psychologists were held.

### **ZARADEMP:**

The Zaragoza Dementia Project (ZARADEMP) is a longitudinal population-based study of dementia and depression in adults aged 55+. The study used a random, representative sample of population of Zaragoza, Spain (700,000 inhabitants) drawn from the official census lists. It included institutionalized individuals and was stratified with proportional allocation by age and sex. The refusal rate was 20.5%, and 4803 individuals were ultimately interviewed at baseline in 1994. Individuals with dementia and 'subsyndromal' dementia at baseline, according to the Geriatric Mental State (GMS), with its cognitive section and its Automated Geriatric Examination for Computer Assisted Taxonomy package (AGECAT) criteria, were excluded for the follow-up waves.

Dementia screening included a two-phase case finding. In phase I, well-trained and regularly supervised lay-interviewers administered the ZARADEMP interview at the participant's home or place of residence. In phase II, the trained research psychiatrist reassessed participants to confirm the suspected clinical diagnosis of dementia, as well as the presence of depression or anxiety identified in phase I. A similar procedure was implemented in the second, third, and fourth waves (2.5, 4.5, and 12 years later, respectively), in which interviewers were not aware of the results of the baseline interview described beforehand. Information on dementia status extended to the last available follow-up assessment.

### **Gothenburg H70:**

The Gothenburg H70 studies are a number of multidisciplinary epidemiological studies examining representative birth cohorts of older populations in Gothenburg, Sweden drawn from the population register based on birthdates. This study included those examined at age 70, 75 and 79 at baseline in 2000. Individuals with dementia at baseline were excluded. Medical history was obtained by medical doctors or research nurses using semi-structured interviews including questions regarding disorders, symptoms and medication use. Physical examinations included measurements of blood pressure, anthropometry (e.g. height and weight) and

ECG. Blood pressure was measured in the right arm after five minutes rest in the seated position with a manual sphygmomanometer. Trained psychiatric research nurses performed neuropsychiatric examinations using semi-structured interviews that comprised questions about psychiatric disorders and symptoms, and cognitive tests. The neuropsychiatric examinations included assessments of psychiatric symptoms, signs of dementia, tests of mental functioning (e.g. memory, proverbs, language, visuospatial and executive abilities, apraxia, construction, and agnosia), the Mini-Mental State Examination (MMSE) and Alzheimer's Disease Assessment Scale (ADAS).

All participants were asked to provide contact information for a proxy-informant. The proxy-informant interviews were semi-structured and performed by telephone by a research nurse or a psychologist and included questions about medical history, changes in behaviour and intellectual function, as well as questions about age of onset and course of dementia when appropriate. Participants underwent 5-yearly follow-up assessments. Dementia diagnoses at each examination were based on the Diagnostic and Statistical Manual of Mental Disorders, third edition revised (DSM-III-R), using information from psychiatric examinations and proxy-informant interviews. Incident dementia was also based on information from the National Patient Register, which contains information about hospital discharge diagnoses with full national coverage of all Swedish inhabitants. The NPR is coded according to the Swedish version of the International Statistical Classification of Diseases and Related Health Problems (ICD-SE). Dementia diagnoses for individuals lost to follow-up were also informed by the NPR (ICD-10-SE codes: F00-03, G30). Death dates were obtained from the Swedish Tax Agency. Age of dementia onset was estimated based on information from proxy informants, the NPR and the psychiatric examinations.

### **Kungsholmen Project and SNAC-K:**

The Kungsholmen Project (KP) and the Swedish National study on Aging and Care in Kungsholmen (SNAC-K) are both longitudinal population-based cohort studies in the Kungsholmen district of central Stockholm, Sweden, conducted at the Karolinska Institutet. They share some essential design elements and are therefore discussed here together.

KP is a community-based longitudinal study of aging and dementia. In 1987, all 2368 residents, who were 75 years of age or older, living at home or in institutions in the Kungsholmen district of Stockholm, were invited to attend the two-phase designed survey at baseline, and 1810 people (76.4%) participated. Of those, 110 declined to take part in the clinical phase, which aimed at identifying prevalent dementia cases. 225 were diagnosed with definite and questionable dementia, 2 had intellectual disability, and 1473 participants were included in the dementia-free cohort at KP baseline. Of these, 11.7% dropped out before the first follow-up. All participants in KP were followed up every 3 years until 1997-1998.

SNAC-K includes people aged  $\geq 60$ , living at home or in institutions in the same geographical area as the KP participants. Of 5111 people randomly selected from 11 age cohorts, 4590 were alive/eligible, and 3363 (73.3%) participated in the baseline examination (2001-2004), aimed at identifying prevalent dementia cases. Of participants attending baseline who did not have definite or questionable dementia, 10.5% dropped out before the first follow-up. Younger cohorts (60, 66, and 72 years) were followed up every 6 years, and older cohorts (78, 81, 84, 87, and  $\geq 90$  years) every 3 years.

The KP and SNAC-K followed similar protocols for data collection. At baseline data on demographic characteristics (age, sex, and education), lifestyle factors (eg, smoking, alcohol consumption, and physical activity), work-related factors (eg, work complexity and psychosocial working condition), chronic medical conditions (eg, diabetes and hypertension), use of medications, and global cognitive function were collected through structured interviews, clinical examinations, and psychologic testing following the standard procedures. During examinations, the examining physician recorded the current use of medications (eg, antihypertensive and antidiabetic drugs) by inspecting the medication containers. The Stockholm patient registers were linked to the study databases to ascertain history of ischemic heart disease, atrial fibrillation, heart failure, and cerebrovascular disease at baseline.

In KP, a 2-phase procedure was used to identify baseline dementia cases. In the screening phase, all participants were screened using the Mini-Mental State Examination (MMSE). People with an MMSE score  $< 24$  ( $n = 314$ ) and a random sample of those with an MMSE score  $\geq 24$  ( $n = 354$ ) underwent the clinical phase that included comprehensive clinical examinations, laboratory testing, and cognitive testing. During the follow-up phases of KP, all participants were instead directly examined. Dementia diagnosis was made using the criteria of the Diagnostic and Statistical Manual of Mental Disorders, Third Edition, Revised (DSM-III-R) following a validated three-step procedure: two physicians independently made a preliminary diagnosis of dementia, and a third opinion was sought from a senior physician in case of disagreement between the first two diagnoses. In SNAC-K, all participants were examined using structured interviews, clinical examinations, and cognitive testing. The same three-step procedure as in KP was adopted in SNAC-K for the diagnosis of dementia following DSM-IV criteria. In both KP and SNAC-K, medical records and death certificates of participants who died during the follow-up period were collected and reviewed by physicians to determine whether the participants died with dementia. The sensitivity of these death records for incident dementia compared to the intensive cognitive screening during.

**ACT:**

The Adult Changes in Thought (ACT) study is a population-based longitudinal cohort study, recruited through the Kaiser Permanente Washington (formerly Group Health Cooperative) integrated healthcare delivery system located in Seattle, the United States. In 1995, 2581 community dwelling dementia-free participants randomly sampled from KPW members aged  $\geq 65$  were enrolled, with an additional 811 participants enrolled from 2000 through 2003. In 2005, the study began continuous enrolment to replace those who died or dropped out. Participants underwent assessment at study entry and every two years to evaluate cognitive function and collect demographic characteristics, medical history, health behaviours, and health status. Completeness of follow-up is very high ( $> 97\%$ ), in part because of the extensive KPW healthcare infrastructure. In addition, information on participants' health care utilization and medication dispensing is available from KPW electronic databases.

Cognitive function is assessed with the Cognitive Abilities Screening Instrument (CASI) at study entry and subsequent biennial visits. CASI scores range from 0 to 100, with higher scores indicating better cognitive performance. Participants with scores  $\leq 85$  undergo a standardized diagnostic evaluation for dementia, including a physical and neurological examination, and neuropsychological tests. Results of these evaluations and laboratory and imaging records are then reviewed in a multidisciplinary consensus conference. Dementia diagnoses are made using research criteria and according to DSM-IV, by a panel of dementia experts. Dementia status for participants who dropped-out or died were based on available medical records.

**preDIVA:**

Prevention of Dementia by Intensive Vascular Care (preDIVA) was a cluster-randomized controlled trial, evaluating the efficacy of nurse-led cardiovascular risk-management at the general practitioner level, over 6-8 years of follow-up. Since the intervention implemented standard cardiovascular guidelines and did not have an overall effect on dementia, the cohort is often employed as a longitudinal cohort study. All community-dwelling persons, registered with a participating GP were selected from electronic health registry. Persons were excluded if, according to their GP, they suffered from (probable) dementia, were terminally ill, did not understand Dutch, or had other conditions that could hinder successful long-term follow-up, like serious chronic diseases, cancer or alcoholism. Eligible individuals willing to participate underwent cognitive screening by trained research nurses at baseline using the MMSE and visual association test (VAT). Individuals with an MMSE  $< 24$  were referred to their GP for further clinical evaluation, and excluded in case of suspected possible dementia. Of the total eligible population between 70 and 78, 52.1% (3526/6762) participated (in 2006-2009). The baseline characteristics of the study population were comparable to those of other Dutch population representative community-dwelling cohorts.

During the pre-DIVA follow-up. General participant demographic and anthropomorphic characteristics, self-reported life-style factors, and medical history was collected based on participant interviews cross-referenced with the patients' electronic health records. Blood pressure was measured at the assessments twice, in sitting position, using a calibrated electronic device, according with standard general practice guidelines. Cognitive status was assessed at two-yearly follow-up assessments by a trained research nurse, using the MMSE and VAT. Also, clinical diagnoses were collected from the medical records. In cases of suspected (possible) dementia, all potentially relevant data on cognitive status, medical history, and follow-up investigation, were gathered, and presented independently to two members of a blinded outcome adjudication committee, comprising dementia specialized neurologists, general practitioners, and internists, to establish dementia status. Diagnoses were made according to DSM-IV criteria. In case of disagreement, a third member of the committee was consulted, blinded to the other members' adjudication. For individuals who died or dropped-out during the study, a dedicated research nurse gathered all the clinical information available on cognitive status at the end of the trial and/or prior to death from patients' electronic health databases and through contact with the general practitioner. Death records from the municipal registration were also consulted. All potentially relevant data regarding cognitive status before the time of death or at the end of the trial gathered were presented to the blinded outcome adjudication committee, who assessed dementia outcome according to the standard study procedure. Individuals with questionable dementia or insufficient information to establish cognitive status were left out of the analyses. Patients with a dementia diagnoses were followed-up after a year of the established date of diagnosis, to confirm the diagnosis.

### eMethods 3. Models and Model Selection

Relationships between baseline blood and incident dementia were assessed using Cox regression, with dementia diagnosis/censoring age as timescale and baseline age as time of entry. Relationships of BP with incident dementia, mortality and dementia/mortality combined were evaluated within individual study populations using fixed effect models. For the combined population, mixed effects models with random study-specific baseline hazards (sometimes also referred to as frailty term or random intercept per study) were used. We evaluated the inclusion of random effects for baseline blood pressure per study, but this did not improve the model fit according to the Aikake Information Criterion (AIC).

The final R code used for the models amounted to:

```
coxme(Surv(Baseline_Age, Censoring_Age, Outcome) ~ ns(baseline_blood_pressure, df) + sex + AHM + (1|Study) )
```

Wherein 'df' is the degrees of freedom for the optimal non-linear model, AHM the use of antihypertensive medication coded as yes/no/unknown categorical variable, and 1|Study is the frailty (or random baseline hazard / random intercept) per study.

Systolic and diastolic BP were evaluated independently in separate models. Potential non-linear associations were examined using natural splines. Allowed degrees of freedom (df) ranged from 2 (1 knot at 50th percentile) to 4 (3 knots at 25th, 50th and 75th percentiles), the specific number chosen based on the best model fit according to the Akaike Information Criterion (AIC). A four df maximum was chosen because model generalizability may decrease with high df, while restriction to the minimal two df (a parabola-like shape) may mask biologically plausible relationships (e.g. HR 'plateauing' between certain BP levels). From the best fitting non-linear model, the BP associated with the lowest dementia risk (LR point) was recorded, with 95% confidence intervals (95%CI) calculated as the 2.5th and 97.5th percentiles from 1,000 bootstraps.

#### eMethods 4. Interpretation of Confidence Intervals

The interpretation of confidence intervals (CI) obtained from bootstrapped analyses from the BP (BP) estimates associated with the lowest risk (LR points) differs somewhat from those of the (linear) hazard ratio's. They can be asymmetrical and denote likely values (<2.5<sup>th</sup> / >97.5<sup>th</sup> percentile) beyond which the risk increases. Confidence interval width is not necessarily a reflection of power for the analyses, but also an indication of the shape of the association. Extreme values suggest uncertainty that the risk increases extending from the LR point. Consider the figures below.

They depict simulated U-shaped, J-shaped, L-shaped and negatively linear relationships of a normally distributed BP on the x axis (mean=150, SD=17.5), with a simulated risk on the y-axis. All these models are well-powered, with 5,000 individuals and a correlation between the shape of the relationship and the data points of approximately 0.2. The continuous red line is the modelled regression line, with its 95%CI in yellow. The p-value for the models' fit is <0.001. The 'true' LR point for all non-linear models is approximately 150 mmHg. Depicted in blue are the modelled lowest risk point (LR) and its 95% CI derived from 1,000 bootstraps.

Note that the (horizontal) 95%CI for the LR point do not directly depend on the (vertical) width of the yellow CI, but rather on whether the yellow CI include the risk at the LR point. As a rule of thumb for the depicted non-linear relationships: the lower and upper CI for the LR point are the points where the lowest yellow CI is (substantially) higher than the risk at the LR point.

In a perfect U-shaped relationship (A), the LR is accurately estimated with narrow CI (LR=149, 95%CI=146-152). In a J-shaped relation (B), the LR is estimated at a slightly higher BP value, with asymmetrical CI, slightly wider towards higher values (LR=153, 95%CI=148-159). This is caused by the right side of the relationship being 'flatter'. Therefore the exact point where the risks starts to rise again with higher BP is less clear. In the simulated L-shaped relationship (C), the true LR point is still 150 mmHg, but the increment in risk with higher BP from there is very small. The LR point is estimated at 156 mmHg and the 148 mmHg lower CI for the LR is comparable to the U- and J-shaped relationships the 207 mmHg upper CI for the LR is however extremely wide, extending to the highest observed BP value in the dataset. This is not due to a lack of power, but rather to uncertainty of the relationship to the right of the LR point. The relationship to the right of the LR may also be neutral, as illustrated by the lowest yellow CI to the right of the LR point never becoming substantially higher than the risk at the LR point. The depicted LR point of 156 mmHg with a CI=148-207 therefore conveys relative (percentile>2.5) certainty that a BP <148 mmHg is associated with increased risk compared to 156 mmHg, but uncertainty about whether BPs above 156 mmHg increase risk. This does not mean that an extremely high blood pressure values are favourable. Consider the negatively linear relationship (D). Theoretically, the lowest observed value in the data would be the value conveying the lowest risk. However, in practice, although negatively and positively linear associations are not uncommonly found in the literature, extremely high, but also low BP values should generally not be interpreted as ideal. Similarly, the extreme values in the CI for non-linear LR points should not be interpreted as signifying that extreme values are is nothing to worry about, but rather the best description of the relationship beyond the LR point may be neutral or negative.

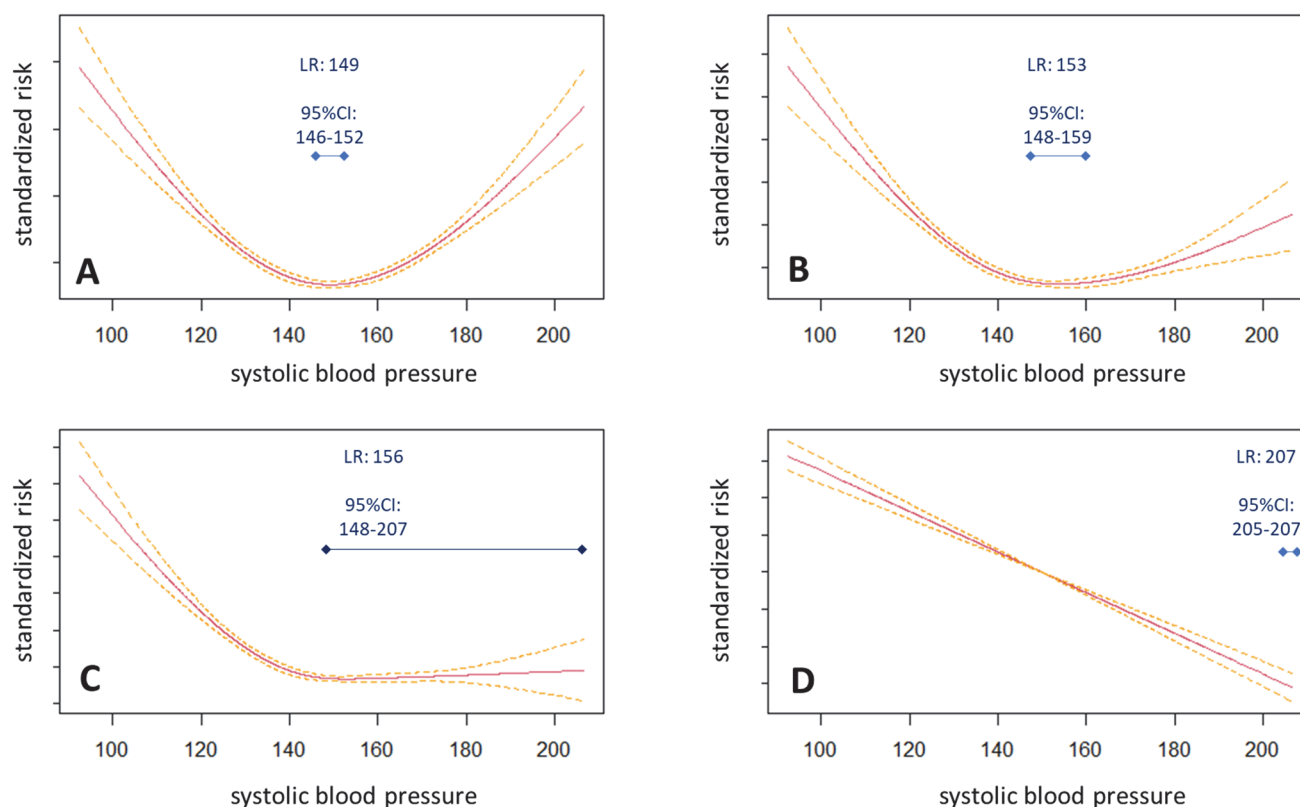

**Illustration of the relation between association shapes and confidence intervals.** Data derived from simulated relationships of 5,000 individuals. LR: blood pressure associated with the lowest risk, blue 95%CI: 95% confidence interval of LR estimate operationalised as the 2.5<sup>th</sup> and 97.5<sup>th</sup> percentile derived from 1,000 bootstraps

## eMethods 5. Choice of Age-Bands and Shift in Analysis

To investigate our hypothesis that the shape of the associations between blood pressure and dementia risk changed with baseline age, and that the blood pressures associated with the lowest risk were higher for older individuals, we performed subgroup analyses. We focussed on the age-range from 65 to 90 because we had relatively few participants/events outside of this bandwidth. Furthermore, we used 10-year age bands, but shifting them 5-years at a time, thereby studying overlapping age categories. The motivation for this was twofold:

1.) Our hypothesis was that the blood pressure associated with the lowest risk of dementia would gradually shift to higher levels with higher baseline age. By jumping 10-years at a time, we would only have 3 informative age bands (65-75, 75-85, and 85-95), the remaining ones having too small numbers of participants. We would therefore be unable to tell whether any difference in blood pressure associated with the lowest risk for the middle and the oldest category indeed represented a gradual shift with ageing, or was just based on chance. By shifting 5-year age bands at the time, we could better study whether there was an indication for such a gradual shift. However, if we would have used 5-year age bands, would have very much limited our statistical power. Using 10-year age bands but shifting them 5-years per step ensured we could study the gradual shift, while maintaining sufficient power.

2.) With the overlapping populations, we could better assess whether findings were caused by domination of single studies. For example, H70 and preDIVA only included participants aged approximately 70-80 years at baseline, and therefore may have a very strong impact on findings within this age band. Would we have only analysed this group, it would be difficult to tell whether findings would more likely be due to the shift in age or the shift in study populations. With the overlapping age bands, we can ensure that the inclusion of new study populations was gradual, and that results within one age band weren't caused by particular studies dominating that group.



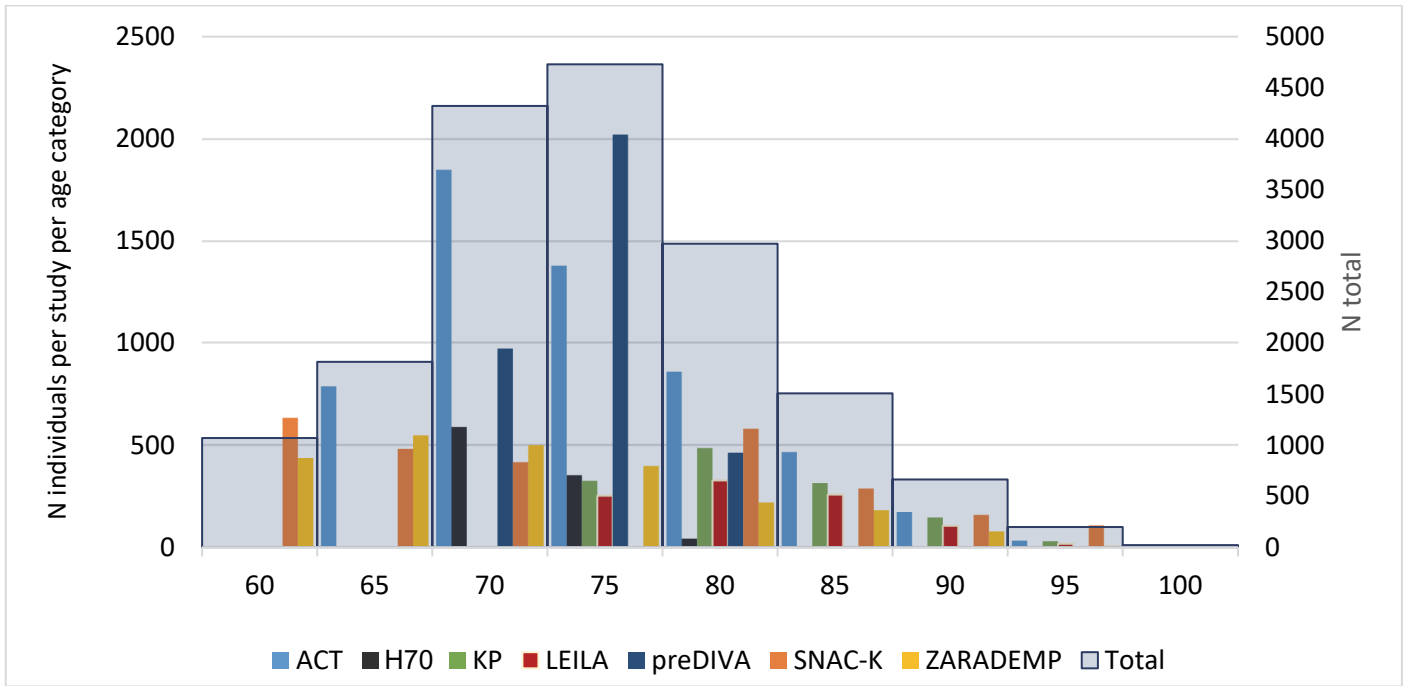

**eFigure 1. Participants per 5-Year Age Categories per Study.** (narrow bars, left y-axis) and total (wide bars, right y-axis). Abbreviations: ACT: Adult Changes in Thought study, H70: Gothenburg H70 Birth Cohort, KP: Kungholmen Project, LEILA75+: Leipzig Longitudinal Study of the Aged 75+, preDIVA: Prevention of Dementia by Intensive Vascular Care study, SNAC-K: Swedish National Study on Aging and Care in Kungsholmen, ZARADEMP: Zaragoza Dementia Depression Project

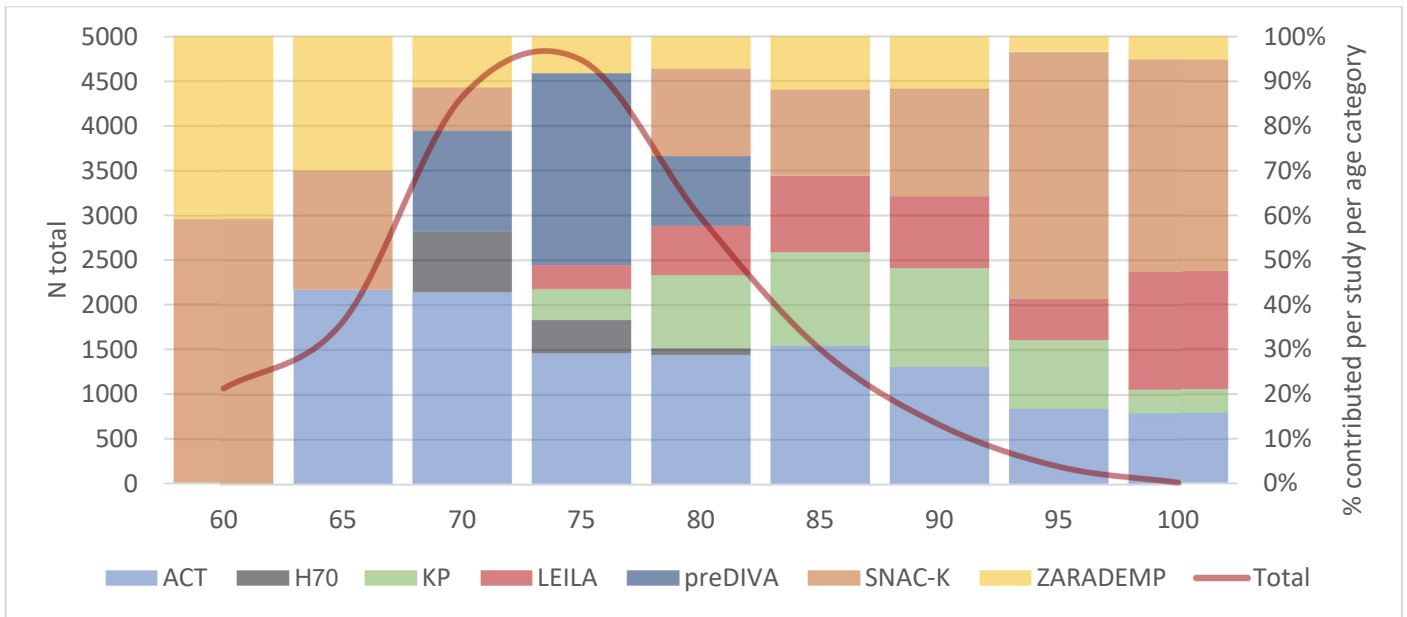

**eFigure 2. Percentage Contribution per Study per 5-Year Age Category.** (coloured bar sections, percentage on right y-axis) to total number of participants (red line, number of individuals on left y-axis). Abbreviations: ACT: Adult Changes in Thought study, H70: Gothenburg H70 Birth Cohort, KP: Kungholmen Project, LEILA75+: Leipzig Longitudinal Study of the Aged 75+, preDIVA: Prevention of Dementia by Intensive Vascular Care study, SNAC-K: Swedish National Study on Aging and Care in Kungsholmen, ZARADEMP: Zaragoza Dementia Depression Project

| Outcome          | Baseline Age | Studies | Cases | Total  | LR point (mmHg) | 95%CI (mmHg) |     | p                |
|------------------|--------------|---------|-------|--------|-----------------|--------------|-----|------------------|
| <b>Dementia</b>  | All          | 7       | 2735  | 16,860 | 139             | 80           | 139 | 0.16             |
|                  | 60-70        | 5       | 230   | 3720   | 130             | 86           | 130 | 0.07             |
|                  | 65-75        | 6       | 786   | 7656   | 130             | 62           | 130 | 0.36             |
|                  | 70-80        | 7       | 1352  | 9602   | 133             | 77           | 133 | 0.26             |
|                  | 75-85        | 7       | 1390  | 6449   | 139             | 128          | 139 | 0.048            |
|                  | 80-90        | 7       | 947   | 2922   | 110             | 79           | 139 | 0.17             |
|                  | 85-95        | 5       | 535   | 1504   | 96              | 68           | 136 | 0.36             |
|                  | >90          | 5       | 121   | 345    | 79              | 46           | 120 | 0.77             |
| <b>Mortality</b> | All          | 7       | 7683  | 16,856 | 84              | 80           | 97  | <b>0.002</b>     |
|                  | 60-70        | 5       | 941   | 3720   | 82              | 78           | 88  | <b>0.001</b>     |
|                  | 65-75        | 6       | 2547  | 7655   | 85              | 82           | 103 | <b>&lt;0.001</b> |
|                  | 70-80        | 7       | 3914  | 3914   | 87              | 82           | 133 | <b>0.01</b>      |
|                  | 75-85        | 7       | 3587  | 6446   | 85              | 80           | 133 | <b>0.01</b>      |
|                  | 80-90        | 7       | 2309  | 2922   | 88              | 61           | 139 | 0.45             |
|                  | 85-95        | 5       | 1320  | 1504   | 96              | 47           | 136 | 0.39             |
|                  | >90          | 5       | 328   | 345    | 87              | 76           | 120 | 0.2              |
| <b>Dem/Mort</b>  | All          | 7       | 8359  | 16,858 | 82              | 79           | 93  | <b>0.01</b>      |
|                  | 60-70        | 5       | 1015  | 3720   | 83              | 79           | 99  | <b>0.01</b>      |
|                  | 65-75        | 6       | 2805  | 7655   | 85              | 82           | 98  | <b>&lt;0.001</b> |
|                  | 70-80        | 7       | 4357  | 9600   | 88              | 82           | 133 | <b>0.02</b>      |
|                  | 75-85        | 7       | 3943  | 6448   | 87              | 82           | 139 | <b>0.02</b>      |
|                  | 80-90        | 7       | 2461  | 2922   | 78              | 45           | 139 | <b>0.02</b>      |
|                  | 85-95        | 5       | 1380  | 1504   | 86              | 71           | 136 | 0.29             |
|                  | >90          | 5       | 333   | 345    | 84              | 73           | 120 | 0.42             |

**eTable 1. Relations for Diastolic Blood Pressure With Risk of Dementia, Mortality, and Dementia/Mortality.** Results are shown from non-linear models depending on optimal model fit in age-based subgroups. For each outcome, the blood pressure associated with the lowest risk (LR) point estimated from the model is given, with 95%CI based on 1,000 bootstraps, and the p-value for the non-linear association of SBP with the outcome. Full data for comparison with linear models are provided in eTable 3. Relations are shown for the complete population (overall) and within 10 year age subgroups.

| Outcome  | Baseline Age | Studies | Cases | Total | Optimal Shape | P-non-lin  | AIC Difference | Non-linear model results |       |     | Linear model results |        |       |       |       |        |
|----------|--------------|---------|-------|-------|---------------|------------|----------------|--------------------------|-------|-----|----------------------|--------|-------|-------|-------|--------|
|          |              |         |       |       |               |            |                | LR point                 | 95%CI | p   | HR                   | 95%CI  | P     |       |       |        |
| Dementia | All          | 7       | 2738  | 16873 | Linear        | 0.16       | 0.1            | 185                      | 161   | 230 | 0.001                | 0.997  | 0.995 | 0.999 | 0.001 |        |
|          | 60-70        | 5       | 230   | 3720  | Linear        | 0.76       | 2.0            | 220                      | 150   | 245 | 0.41                 | 0.996  | 0.989 | 1.002 | 0.20  |        |
|          | 65-75        | 6       | 786   | 7656  | Linear        | 0.90       | 1.9            | 197                      | 101   | 230 | 0.77                 | 0.999  | 0.995 | 1.002 | 0.48  |        |
|          | 70-80        | 7       | 1352  | 9602  | Linear        | 0.48       | 1.5            | 224                      | 107   | 260 | 0.09                 | 0.997  | 0.995 | 1.000 | 0.04  |        |
|          | 75-85        | 7       | 1390  | 6449  | Non-linear    | 0.12       | -0.4           | 170                      | 160   | 260 | 0.004                | 0.996  | 0.993 | 0.999 | 0.003 |        |
|          | 80-90        | 7       | 947   | 2922  | Non-linear    | 0.001      | -9.8           | 158                      | 152   | 178 | 0.001                | 0.997  | 0.994 | 1.000 | 0.10  |        |
|          | 85-95        | 5       | 535   | 1504  | Non-linear    | 0.01       | -4.4           | 162                      | 153   | 240 | 0.01                 | 0.996  | 0.993 | 1.000 | 0.07  |        |
|          | >90          | 5       | 121   | 345   | Linear        | 0.72       | 1.9            | 160                      | 87.8  | 231 | 0.93                 | 1.000  | 0.992 | 1.008 | 0.92  |        |
|          | Mortality    | All     | 7     | 7698  | 16869         | Non-linear | <0.001         | -10.4                    | 160   | 154 | 181                  | <0.001 | 0.998 | 0.997 | 1.000 | 0.008  |
|          |              | 60-70   | 5     | 941   | 3720          | Non-linear | 0.01           | -4.2                     | 134   | 102 | 149                  | 0.03   | 1.002 | 0.998 | 1.005 | 0.31   |
| 65-75    |              | 6       | 2547  | 7655  | Non-linear    | 0.01       | -4.3           | 146                      | 130   | 169 | 0.04                 | 1.000  | 0.998 | 1.002 | 0.99  |        |
| 70-80    |              | 7       | 3914  | 9598  | Non-linear    | 0.10       | -0.7           | 166                      | 154   | 260 | 0.02                 | 0.998  | 0.997 | 1.000 | 0.03  |        |
| 75-85    |              | 7       | 3587  | 6446  | Non-linear    | 0.004      | -6.3           | 163                      | 156   | 194 | 0.001                | 0.998  | 0.996 | 1.000 | 0.02  |        |
| 80-90    |              | 7       | 2309  | 2922  | Non-linear    | <0.001     | -12.2          | 155                      | 150   | 166 | <0.001               | 0.999  | 0.997 | 1.001 | 0.25  |        |
| 85-95    |              | 5       | 1320  | 1504  | Non-linear    | 0.01       | -4.6           | 162                      | 154   | 230 | 0.01                 | 0.998  | 0.995 | 1.000 | 0.05  |        |
| >90      |              | 5       | 328   | 345   | Linear        | 0.22       | 0.5            | 160                      | 154   | 220 | 0.13                 | 0.996  | 0.991 | 1.001 | 0.11  |        |
| Dem/Mort |              | All     | 7     | 8375  | 16871         | Non-linear | <0.001         | -10.2                    | 163   | 158 | 197                  | <0.001 | 0.998 | 0.997 | 0.999 | <0.001 |
|          |              | 60-70   | 5     | 1015  | 3720          | Non-linear | 0.06           | -1.4                     | 136   | 86  | 215                  | 0.17   | 1.000 | 0.997 | 1.004 | 0.80   |
|          | 65-75        | 6       | 2805  | 7655  | Non-linear    | 0.02       | -3.4           | 149                      | 139   | 205 | 0.06                 | 0.999  | 0.998 | 1.001 | 0.56  |        |
|          | 70-80        | 7       | 4357  | 9600  | Non-linear    | 0.08       | -1.0           | 169                      | 159   | 260 | 0.003                | 0.998  | 0.996 | 0.999 | 0.003 |        |
|          | 75-85        | 7       | 3943  | 6448  | Non-linear    | <0.001     | -10.7          | 164                      | 157   | 192 | <0.001               | 0.998  | 0.996 | 0.999 | 0.002 |        |
|          | 80-90        | 7       | 2461  | 2922  | Non-linear    | <0.001     | -16            | 157                      | 151   | 167 | <0.001               | 0.998  | 0.996 | 1.000 | 0.10  |        |
|          | 85-95        | 5       | 1380  | 1504  | Non-linear    | 0.047      | -1.9           | 165                      | 153   | 240 | 0.01                 | 0.997  | 0.995 | 1.000 | 0.03  |        |
|          | >90          | 5       | 333   | 345   | Linear        | 0.24       | 0.9            | 229                      | 109   | 231 | 0.20                 | 0.997  | 0.992 | 1.002 | 0.18  |        |

**eTable 2. Complete Results Comparing Linear and Non-Linear Models for Systolic Blood Pressure.** Listed are the results for both the linear and non-linear models in the main analyses for systolic blood pressure (see Table 1 in the manuscript). P-non-lin denotes the p-value for the difference between the linear models and the more complex non-linear models according to the likelihood ratio test. AIC difference denote the difference in AIC values between the linear and optimal non-linear model, with a negative AIC meaning that the non-linear model had a lower AIC (representing a better model fit) than the linear model. Results illustrate that when the best fitting model is linear, LR points for the best fitting non-linear models approximate the extreme values (i.e. highest or lowest values) of the SBP values measured (see eMethods 1).

| Baseline |           | Optimal |       |            |            |            | AIC            |          | Non-linear model results |                  |                  | Linear model results |       |       |             |
|----------|-----------|---------|-------|------------|------------|------------|----------------|----------|--------------------------|------------------|------------------|----------------------|-------|-------|-------------|
| Outcome  | Age       | Studies | Cases | Total      | Shape      | P-non-lin  | AIC Difference | LR point | 95%CI                    | p                | HR               | 95%CI                | P     |       |             |
| Dementia | All       | 7       | 2735  | 16860      | Linear     | 0.57       | 1.7            | 139      | 80                       | 139              | 0.16             | 0.997                | 0.994 | 1.001 | 0.16        |
|          | 60-70     | 5       | 230   | 3717       | Linear     | 0.67       | 1.9            | 130      | 86                       | 130              | 0.07             | 0.984                | 0.97  | 0.998 | <b>0.02</b> |
|          | 65-75     | 6       | 785   | 7647       | Linear     | 0.90       | 2.0            | 130      | 62                       | 130              | 0.36             | 0.995                | 0.988 | 1.002 | 0.16        |
|          | 70-80     | 7       | 1350  | 9585       | Linear     | 0.40       | 1.3            | 133      | 77                       | 133              | 0.26             | 0.996                | 0.991 | 1.001 | 0.16        |
|          | 75-85     | 7       | 1385  | 6426       | Linear     | 0.23       | 1.0            | 139      | 128                      | 139              | 0.048            | 0.994                | 0.989 | 0.999 | <b>0.03</b> |
|          | 80-90     | 7       | 940   | 2899       | Linear     | 0.49       | 1.6            | 110      | 79                       | 139              | 0.17             | 0.995                | 0.989 | 1.001 | 0.08        |
|          | 85-95     | 5       | 532   | 1492       | Linear     | 0.40       | 1.3            | 96       | 68                       | 136              | 0.36             | 0.996                | 0.988 | 1.003 | 0.24        |
|          | >90       | 5       | 121   | 343        | Linear     | 0.50       | 1.6            | 79       | 46                       | 120              | 0.77             | 1.002                | 0.986 | 1.018 | 0.78        |
|          | Mortality | All     | 7     | 7683       | 16856      | Non-linear | 0.002          | -7.5     | 84                       | 80               | 97               | <b>0.002</b>         | 0.998 | 0.996 | 1.000       |
| Dem/Mort | 60-70     | 5       | 939   | 3717       | Non-linear | <0.001     | -11.1          | 82       | 78                       | 88               | <b>0.001</b>     | 0.984                | 0.97  | 0.998 | 0.023       |
|          | 65-75     | 6       | 2541  | 7646       | Non-linear | 0.002      | -8.0           | 85       | 82                       | 103              | <b>&lt;0.001</b> | 0.995                | 0.988 | 1.002 | 0.16        |
|          | 70-80     | 7       | 3902  | 9581       | Non-linear | 0.04       | -2.4           | 87       | 82                       | 133              | <b>0.01</b>      | 0.996                | 0.991 | 1.001 | 0.16        |
|          | 75-85     | 7       | 3569  | 6423       | Non-linear | 0.01       | -4.1           | 85       | 80                       | 133              | <b>0.01</b>      | 0.994                | 0.989 | 0.999 | 0.026       |
|          | 80-90     | 7       | 2290  | 2899       | Linear     | 0.35       | 1.2            | 88       | 61                       | 139              | 0.45             | 0.998                | 0.995 | 1.002 | 0.39        |
|          | 85-95     | 5       | 1310  | 1492       | Linear     | 0.55       | 1.6            | 96       | 47                       | 136              | 0.39             | 0.997                | 0.992 | 1.002 | 0.21        |
|          | >90       | 5       | 326   | 343        | Linear     | 0.22       | 0.4            | 87       | 76                       | 120              | 0.2              | 0.993                | 0.984 | 1.003 | 0.19        |
|          | All       | 7       | 8359  | 16858      | Non-linear | 0.004      | -6.3           | 82       | 79                       | 93               | <b>0.01</b>      | 0.999                | 0.997 | 1.001 | 0.30        |
|          | 60-70     | 5       | 1013  | 3717       | Non-linear | 0.004      | -6.0           | 83       | 79                       | 99               | <b>0.01</b>      | 0.996                | 0.99  | 1.003 | 0.25        |
| 65-75    | 6         | 2799    | 7646  | Non-linear | 0.001      | -8.5       | 85             | 82       | 98                       | <b>&lt;0.001</b> | 0.995            | 0.991                | 0.999 | 0.02  |             |
| 70-80    | 7         | 4345    | 9583  | Non-linear | 0.14       | -0.2       | 88             | 82       | 133                      | <b>0.02</b>      | 0.996            | 0.993                | 0.999 | 0.02  |             |
| 75-85    | 7         | 3925    | 6425  | Non-linear | 0.08       | -1.1       | 87             | 82       | 139                      | <b>0.02</b>      | 0.997            | 0.994                | 1.000 | 0.06  |             |
| 80-90    | 7         | 2441    | 2899  | Non-linear | 0.02       | -4.0       | 78             | 45       | 139                      | <b>0.02</b>      | 0.998            | 0.995                | 1.002 | 0.39  |             |
| 85-95    | 5         | 1369    | 1492  | Linear     | 0.20       | 0.4        | 86             | 71       | 136                      | 0.29             | 0.998            | 0.993                | 1.003 | 0.37  |             |
| >90      | 5         | 331     | 343   | Linear     | 0.27       | 0.8        | 84             | 73       | 120                      | 0.42             | 0.996            | 0.987                | 1.006 | 0.47  |             |

**eTable 3. Complete Results Comparing Linear and Non-Linear Models for Diastolic Blood Pressure.** Listed are the results for both the linear and optimal fitting non-linear models for the main analyses on diastolic blood pressure (see eTable 3). P-non-lin denotes the p-value for the difference between the linear models and the more complex non-linear models according to the likelihood ratio test. AIC difference denote the difference in AIC values between the linear and optimal non-linear model, with a negative AIC meaning that the non-linear model had a lower AIC (representing a better model fit) than the linear model. Results illustrate that when the best fitting model is linear, LR points for the best fitting non-linear models approximate the extreme values (i.e. highest or lowest values) of the SBP values measured (see eMethods 1).

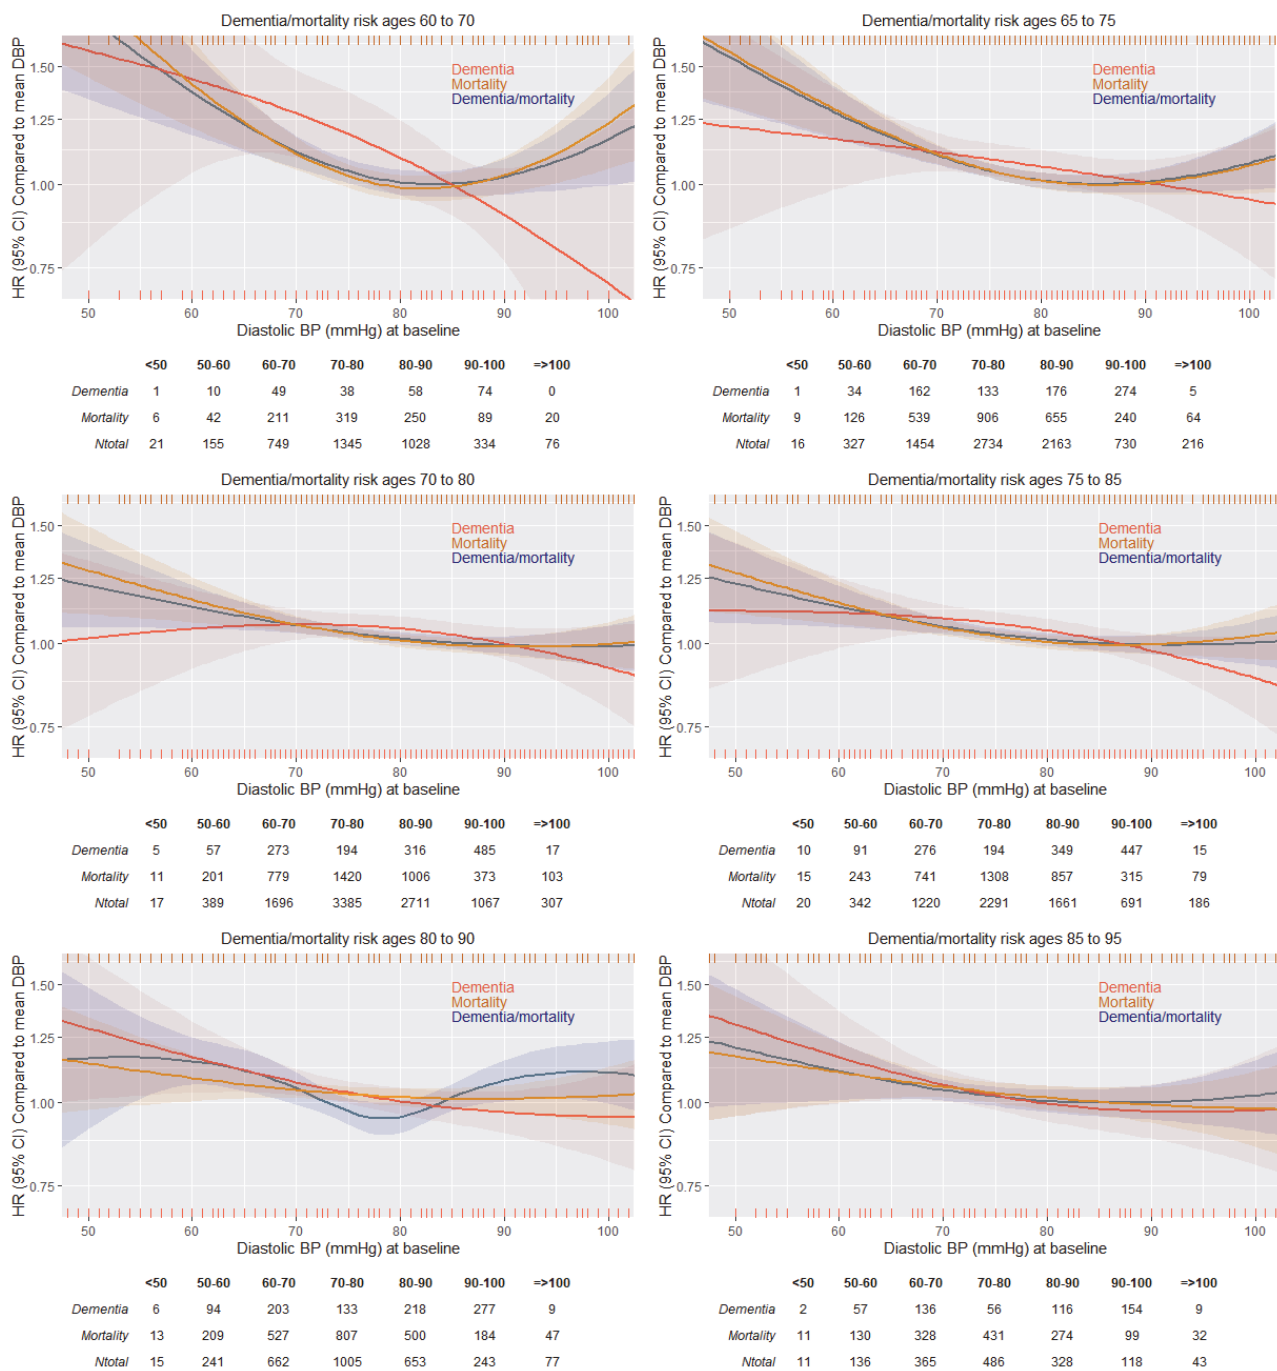

**eFigure 3. Relations Between Diastolic Blood Pressure and Risk of Dementia/Mortality Combined.** Results are presented in 10-year age-bands in the combined study population aged 60 to 95 years old. The coloured lines represent the relative hazard ratio (HR) on the y-axis, according to blood pressure in mmHg on the x-axis. Shaded areas represent 95% confidence intervals. Orange vertical stripes (top) represent one or multiple mortality cases at that specific DBP, red vertical stripes (bottom) represent one or multiple dementia cases at that specific BP. “HR compared to mean DBP” denotes that the HR is 1.00 at the mean DBP. Models fitted using natural splines, with degrees of freedom selected from 1 (linear model) upto a maximum of 4 (knots at 25<sup>th</sup>, 50<sup>th</sup> and 75<sup>th</sup> percentile), based on optimal model fit according to the Akaike Information Criterion (AIC). Models are adjusted for sex and antihypertensive use.

| Subgroup      | Outcome   | Baseline Age | Studies | Cases  | Total | Optimal Shape | P-non-lin | AIC Difference | LR point | Non-linear model results 95%CI | p     | HR     | Linear model results 95%CI | P     |       |
|---------------|-----------|--------------|---------|--------|-------|---------------|-----------|----------------|----------|--------------------------------|-------|--------|----------------------------|-------|-------|
| AHM users     | Dementia  | All          | 7       | 1102   | 6947  | Non-linear    | 0.09      | -4.5           | 178      | 160                            | 230   | 0.002  | 0.995                      | 0.993 | 0.998 |
|               |           | 60-70        | 5       | 84     | 1220  | Linear        | 0.18      | 0.7            | 96       | 95                             | 212   | 0.33   | 1.001                      | 0.990 | 1.012 |
|               |           | 65-75        | 6       | 311    | 3096  | Linear        | 0.66      | 1.8            | 159      | 94                             | 230   | 0.90   | 1.000                      | 0.994 | 1.005 |
|               |           | 70-80        | 7       | 553    | 4211  | Linear        | 0.9       | 2.0            | 228      | 165                            | 230   | 0.08   | 0.995                      | 0.991 | 0.999 |
|               |           | 75-85        | 7       | 556    | 2827  | Non-linear    | 0.15      | -0.5           | 186      | 161                            | 228   | 0.004  | 0.994                      | 0.990 | 0.998 |
|               |           | 80-90        | 7       | 371    | 1241  | Non-linear    | 0.002     | -39.5          | 167      | 153                            | 180   | 0.001  | 0.995                      | 0.990 | 1.000 |
|               |           | 85-95        | 5       | 226    | 663   | Non-linear    | 0.03      | -13.5          | 173      | 157                            | 230   | 0.003  | 0.992                      | 0.986 | 0.998 |
|               |           | All          | 7       | 1549   | 9523  | Linear        | 0.63      | 1.7            | 222      | 150                            | 225   | 0.15   | 0.998                      | 0.995 | 1.000 |
|               |           | 60-70        | 5       | 145    | 2487  | Linear        | 0.56      | 1.7            | 220      | 114                            | 220   | 0.25   | 0.993                      | 0.985 | 1.002 |
| AHM non-users | Dementia  | 65-75        | 6       | 473    | 4528  | Linear        | 0.33      | 1.0            | 225      | 90                             | 225   | 0.54   | 0.999                      | 0.994 | 1.003 |
|               |           | 70-80        | 7       | 769    | 5172  | Linear        | 0.27      | 0.7            | 225      | 90                             | 225   | 0.49   | 0.999                      | 0.996 | 1.003 |
|               |           | 75-85        | 7       | 777    | 3317  | Linear        | 0.45      | 1.4            | 182      | 144                            | 225   | 0.24   | 0.997                      | 0.994 | 1.001 |
|               |           | 80-90        | 6       | 522    | 1505  | Non-linear    | 0.09      | -4.5           | 161      | 145                            | 220   | 0.10   | 0.997                      | 0.993 | 1.001 |
|               |           | 85-95        | 5       | 276    | 748   | Non-linear    | 0.13      | -1.5           | 159      | 144                            | 220   | 0.19   | 0.997                      | 0.991 | 1.003 |
|               |           | All          | 7       | 3249   | 6944  | Non-linear    | 0.001     | -43.5          | 164      | 156                            | 183   | <0.001 | 0.998                      | 0.996 | 0.999 |
|               |           | 60-70        | 5       | 350    | 1220  | Linear        | 0.04      | 2.3            | 145      | 96                             | 165   | 0.11   | 1.001                      | 0.995 | 1.006 |
|               |           | 65-75        | 6       | 1044   | 3095  | Linear        | 0.004     | 6.4            | 157      | 147                            | 169   | 0.01   | 0.999                      | 0.996 | 1.002 |
|               |           | 70-80        | 7       | 1657   | 4208  | Linear        | 0.02      | 3.7            | 172      | 160                            | 230   | 0.001  | 0.996                      | 0.994 | 0.999 |
| AHM non-users | Mortality | 75-85        | 7       | 1523   | 2825  | Non-linear    | 0.01      | -23.5          | 169      | 158                            | 228   | 0.001  | 0.996                      | 0.994 | 0.999 |
|               |           | 80-90        | 7       | 992    | 1241  | Non-linear    | 0.01      | -23            | 158      | 146                            | 176   | 0.03   | 0.999                      | 0.996 | 1.002 |
|               |           | 85-95        | 5       | 589    | 663   | Non-linear    | 0.22      | -3.0           | 169      | 98                             | 230   | 0.24   | 0.998                      | 0.994 | 1.002 |
|               |           | All          | 7       | 4255   | 9522  | Linear        | 0.06      | 1.7            | 156      | 144                            | 225   | 0.0501 | 0.999                      | 0.997 | 1.000 |
|               |           | 60-70        | 5       | 586    | 2487  | Linear        | 0.06      | 1.7            | 134      | 90                             | 149   | 0.10   | 1.002                      | 0.998 | 1.007 |
|               |           | 65-75        | 6       | 1492   | 4528  | Linear        | 0.21      | 0.5            | 135      | 90                             | 172   | 0.31   | 1.001                      | 0.999 | 1.004 |
|               |           | 70-80        | 7       | 2172   | 5171  | Linear        | 0.95      | 2.0            | 220      | 90                             | 225   | 0.87   | 0.999                      | 0.997 | 1.002 |
|               |           | 75-85        | 7       | 1928   | 3316  | Non-linear    | 0.04      | -2.2           | 160      | 139                            | 225   | 0.04   | 0.998                      | 0.996 | 1.001 |
|               |           | 80-90        | 6       | 1216   | 1505  | Non-linear    | 0.01      | -31.0          | 150      | 135                            | 220   | 0.01   | 0.998                      | 0.995 | 1.001 |
| 85-95         | 5         | 668          | 748     | Linear | 0.17  | 0.5           | 170       | 150            | 220      | 0.04                           | 0.996 | 0.992  | 1.000                      |       |       |

**Table 4. Relations for Systolic Blood Pressure With Risk of Dementia, Mortality, and Dementia/Mortality in Age Groups, Stratified According to Antihypertensive Medication (AHM) Use.** Results are shown from non-linear and linear models. For each outcome, the optimal shape is given, with the p-value comparing the optimal non-linear model to the optimal linear model (i.e. a p-non-linear value >0.05 denotes that the non-linear model was not significantly better than the linear model according to the log-likelihood ratio test). For linear models, the hazard ratio (HR) per mmHg increment, 95% confidence intervals (95% CI) and p-value for the linear association of SBP with the outcome are given. For non-linear models, the blood pressure associated with the lowest risk (LR) point estimated from the model is given with 95% CI based on 1,000 bootstraps, and the p-value for the non-linear association of SBP with the outcome. Relations are shown for the complete population (overall) and within 10 year age subgroups.

| AHM users            | Outcome            | Baseline Age | Studies | Cases | Total | Optimal Shape | P-non-lin | AIC Difference | Non-linear model results |       |     | Linear model results |       |       |       |        |
|----------------------|--------------------|--------------|---------|-------|-------|---------------|-----------|----------------|--------------------------|-------|-----|----------------------|-------|-------|-------|--------|
|                      |                    |              |         |       |       |               |           |                | LR point                 | 95%CI | p   | HR                   | 95%CI | P     |       |        |
|                      | Dementia/Mortality | All          | 7       | 3528  | 6945  | Non-linear    | 0.001     | -43            | 168                      | 159   | 196 | <0.001               | 0.997 | 0.995 | 0.998 | <0.001 |
|                      | Mortality          | 60-70        | 5       | 375   | 1220  | Linear        | 0.07      | 1.3            | 147                      | 96    | 212 | 0.19                 | 0.999 | 0.994 | 1.005 | 0.84   |
|                      |                    | 65-75        | 6       | 1154  | 3095  | Linear        | 0.002     | 7.4            | 159                      | 151   | 180 | 0.003                | 0.998 | 0.995 | 1.001 | 0.17   |
|                      |                    | 70-80        | 7       | 1855  | 4209  | Linear        | 0.03      | 3.0            | 179                      | 164   | 230 | <0.001               | 0.996 | 0.994 | 0.998 | <0.001 |
|                      |                    | 75-85        | 7       | 1668  | 2826  | Non-linear    | 0.01      | -27            | 172                      | 161   | 228 | <0.001               | 0.996 | 0.994 | 0.998 | 0.001  |
|                      |                    | 80-90        | 7       | 1046  | 1241  | Non-linear    | 0.001     | -43.5          | 158                      | 150   | 171 | 0.003                | 0.998 | 0.995 | 1.001 | 0.27   |
|                      |                    | 85-95        | 5       | 613   | 663   | Non-linear    | 0.26      | -4.0           | 182                      | 152   | 230 | 0.09                 | 0.996 | 0.993 | 1.000 | 0.06   |
| <b>AHM non-users</b> | Dementia/Mortality | All          | 7       | 4623  | 9523  | Linear        | 0.06      | 1.6            | 160                      | 148   | 225 | 0.02                 | 0.998 | 0.997 | 1.000 | 0.99   |
|                      |                    | 60-70        | 5       | 635   | 2487  | Linear        | 0.24      | 0.6            | 138                      | 90    | 220 | 0.48                 | 1.001 | 0.997 | 1.005 | 0.74   |
|                      |                    | 65-75        | 6       | 1640  | 4528  | Linear        | 0.38      | 1.2            | 138                      | 90    | 225 | 0.52                 | 1.001 | 0.998 | 1.003 | 0.46   |
|                      |                    | 70-80        | 7       | 2406  | 5172  | Linear        | 0.84      | 1.9            | 221                      | 90    | 225 | 0.66                 | 0.999 | 0.997 | 1.001 | 0.38   |
|                      |                    | 75-85        | 7       | 2120  | 3317  | Linear        | 0.02      | 3.5            | 225                      | 139   | 225 | 0.01                 | 0.998 | 0.995 | 1.000 | 0.03   |
|                      |                    | 80-90        | 6       | 1296  | 1505  | Non-linear    | 0.01      | -33.0          | 220                      | 142   | 220 | 0.003                | 0.998 | 0.995 | 1.000 | 0.07   |
|                      |                    | 85-95        | 5       | 693   | 748   | Linear        | 0.17      | 0.0            | 165                      | 147   | 220 | 0.09                 | 0.997 | 0.993 | 1.000 | 0.09   |

**eTable 4. Relations for Systolic Blood Pressure With Risk of Dementia, Mortality, and Dementia/Mortality in Age Groups, Stratified According to Antihypertensive Medication (AHM) Use.** Results are shown from non-linear and linear models. For each outcome, the optimal shape is given, with the p-value comparing the optimal non-linear model to the optimal linear model (i.e. p-non-linear value >0.05 denotes that the non-linear model was not significantly better than the linear model according to the log-likelihood ratio test). For linear models, the hazard ratio (HR) per mmHg increment, 95% confidence intervals (95%CI) and p-value for the linear association of SBP with the outcome are given. For non-linear models, the blood pressure associated with the lowest risk (LR) point estimated from the model is given, with 95%CI based on 1,000 bootstraps, and the p-value for the non-linear association of SBP with the outcome. Relations are shown for the complete population (overall) and within 10 year age subgroups.



| AHM users     | Outcome   | Baseline Age | Studies |   |   | Cases | Total | Optimal    |           | AIC Difference | Non-linear model results |       |     | Linear model results |       |       |       |       |
|---------------|-----------|--------------|---------|---|---|-------|-------|------------|-----------|----------------|--------------------------|-------|-----|----------------------|-------|-------|-------|-------|
|               |           |              | 7       | 5 | 6 |       |       | Shape      | P-non-lin |                | LR point                 | 95%CI | p   | HR                   | 95%CI | P     |       |       |
| AHM non-users | Dementia  | All          | 7       | 5 | 6 | 1104  | 6939  | Linear     | 0.42      | 1.3            | 123.5                    | 45    | 124 | 0.33                 | 0.997 | 0.991 | 1.002 | 0.21  |
|               |           | 60-70        | 5       | 6 | 7 | 84    | 1218  | Linear     | 0.90      | 1.9            | 120                      | 82    | 120 | 0.23                 | 0.996 | 0.986 | 1.006 | 0.42  |
|               |           | 65-75        | 6       | 7 | 7 | 311   | 3091  | Linear     | 0.87      | 2.0            | 122                      | 45    | 124 | 0.71                 | 0.995 | 0.990 | 1.001 | 0.09  |
|               |           | 70-80        | 7       | 7 | 7 | 554   | 4206  | Linear     | 0.42      | 1.4            | 123.5                    | 45    | 124 | 0.24                 | 0.994 | 0.990 | 0.998 | 0.006 |
|               |           | 75-85        | 7       | 7 | 7 | 556   | 2820  | Linear     | 0.32      | 1.0            | 120                      | 79    | 120 | 0.16                 | 0.996 | 0.992 | 1.001 | 0.09  |
|               |           | 80-90        | 7       | 7 | 7 | 369   | 1234  | Linear     | 0.95      | 2.0            | 115                      | 45    | 120 | 0.64                 | 1.001 | 0.995 | 1.007 | 0.75  |
|               |           | 85-95        | 5       | 5 | 5 | 227   | 666   | Linear     | 0.96      | 1.9            | 120                      | 80    | 120 | 0.32                 | 0.996 | 0.989 | 1.003 | 0.30  |
|               |           | All          | 7       | 5 | 6 | 1545  | 9515  | Linear     | 0.82      | 1.9            | 97.8                     | 45    | 130 | 0.86                 | 0.999 | 0.994 | 1.004 | 0.61  |
|               |           | 60-70        | 5       | 6 | 7 | 145   | 2490  | Linear     | 0.26      | 1.3            | 125                      | 93    | 125 | 0.2                  | 0.995 | 0.988 | 1.003 | 0.26  |
| AHM users     | Mortality | All          | 7       | 5 | 6 | 3243  | 6936  | Linear     | 0.51      | 1.8            | 104.8                    | 80    | 124 | 0.14                 | 0.997 | 0.994 | 1.000 | 0.06  |
|               |           | 60-70        | 5       | 6 | 7 | 349   | 1218  | Non-linear | 0.01      | -0.8           | 83                       | 78    | 98  | 0.04                 | 0.98  | 0.958 | 1.003 | 0.08  |
|               |           | 65-75        | 6       | 7 | 7 | 1040  | 3090  | Non-linear | 0.09      | -0.8           | 89                       | 45    | 120 | 0.04                 | 0.995 | 0.985 | 1.006 | 0.42  |
|               |           | 70-80        | 7       | 7 | 7 | 1652  | 4203  | Linear     | 0.99      | 1.9            | 123.5                    | 92    | 124 | 0.004                | 0.994 | 0.986 | 1.002 | 0.14  |
|               |           | 75-85        | 7       | 7 | 7 | 1516  | 2818  | Non-linear | 0.7       | -0.5           | 120                      | 85    | 120 | 0.049                | 0.994 | 0.986 | 1.001 | 0.11  |
|               |           | 80-90        | 7       | 7 | 7 | 986   | 1234  | Non-linear | 0.55      | -3.7           | 80                       | 45    | 120 | 0.82                 | 0.995 | 0.986 | 1.005 | 0.34  |
|               |           | 85-95        | 5       | 5 | 5 | 593   | 666   | Linear     | 0.50      | 1.8            | 87                       | 53    | 120 | 0.50                 | 0.991 | 0.979 | 1.003 | 0.13  |
|               |           | All          | 7       | 5 | 6 | 4244  | 9514  | Non-linear | 0.004     | -6.5           | 81                       | 76    | 90  | 0.01                 | 0.999 | 0.996 | 1.002 | 0.44  |
|               |           | 60-70        | 5       | 6 | 7 | 586   | 2490  | Non-linear | 0.003     | -4.2           | 81                       | 76    | 90  | 0.01                 | 0.988 | 0.97  | 1.005 | 0.16  |
| AHM non-users | Mortality | All          | 7       | 5 | 6 | 1492  | 4531  | Non-linear | 0.003     | -7.0           | 82.2                     | 78    | 91  | 0.004                | 0.995 | 0.986 | 1.004 | 0.30  |
|               |           | 60-70        | 6       | 7 | 7 | 2171  | 5170  | Non-linear | 0.01      | -2.0           | 80.5                     | 73    | 90  | 0.04                 | 0.999 | 0.992 | 1.006 | 0.73  |
|               |           | 65-75        | 7       | 7 | 7 | 1923  | 3312  | Non-linear | 0.01      | -2.6           | 81.5                     | 75    | 99  | 0.04                 | 0.996 | 0.989 | 1.003 | 0.26  |
|               |           | 70-80        | 6       | 6 | 6 | 1207  | 1496  | Linear     | 0.27      | 1.1            | 120                      | 67    | 120 | 0.35                 | 0.996 | 0.988 | 1.004 | 0.31  |
|               |           | 75-85        | 5       | 5 | 5 | 663   | 743   | Linear     | 0.98      | 0.6            | 119                      | 46    | 120 | 0.65                 | 0.997 | 0.987 | 1.008 | 0.64  |

**Table 5. Relations for Diastolic Blood Pressure With Risk of Dementia, Mortality, and Dementia/Mortality in Age groups, Stratified According to Antihypertensive Medication (AHM) Use.** Results are shown from non-linear and linear models. For each outcome, the optimal shape is given, with the p-value comparing the optimal non-linear model to the optimal linear model (i.e. p-non-linear value >0.05 denotes that the non-linear model was not significantly better than the linear model according to the log-likelihood ratio test). For linear models, the hazard ratio (HR) per mmHg increment, 95% confidence intervals (95%CI) and p-value for the linear association of DBP with the outcome are given. For non-linear models, the blood pressure associated with the lowest risk (LR) point estimated from the model is given, with 95%CI based on 1,000 bootstraps, and the p-value for the non-linear association of DBP with the outcome. Relations are shown for the complete population (overall) and within 10 year age subgroups.



| AHM users     | Outcome            | Baseline Age | Studies | Cases | Total | Optimal Shape | P-non-lin | AIC Difference | Non-linear model results |       |      | Linear model results |       |       |       |       |
|---------------|--------------------|--------------|---------|-------|-------|---------------|-----------|----------------|--------------------------|-------|------|----------------------|-------|-------|-------|-------|
|               |                    |              |         |       |       |               |           |                | LR point                 | 95%CI | p    | HR                   | 95%CI | P     |       |       |
|               |                    | All          | 7       | 3521  | 6937  | Linear        | 0.66      | 1.6            | 100                      | 45    | 124  | 0.51                 | 0.998 | 0.995 | 1.001 | 0.29  |
|               |                    | 60-70        | 5       | 374   | 1218  | Non-linear    | 0.09      | -4.3           | 85                       | 74    | 120  | 0.17                 | 0.996 | 0.986 | 1.007 | 0.49  |
|               |                    | 65-75        | 6       | 1150  | 3090  | Non-linear    | 0.1       | -0.9           | 90                       | 82    | 124  | 0.06                 | 0.995 | 0.989 | 1.000 | 0.07  |
|               |                    | 70-80        | 7       | 1850  | 4204  | Linear        | 0.81      | 2              | 124                      | 91    | 124  | 0.02                 | 0.992 | 0.988 | 0.997 | 0.001 |
|               |                    | 75-85        | 7       | 1661  | 2819  | Linear        | 0.09      | 1.8            | 120                      | 115   | 120  | 0.053                | 0.994 | 0.99  | 0.999 | 0.02  |
|               |                    | 80-90        | 7       | 1039  | 1234  | Linear        | 0.02      | 1.6            | 78                       | 45    | 120  | 0.04                 | 0.999 | 0.994 | 1.005 | 0.84  |
|               |                    | 85-95        | 5       | 616   | 666   | Linear        | 0.62      | 1.5            | 100                      | 51    | 120  | 0.51                 | 0.996 | 0.989 | 1.004 | 0.34  |
|               |                    | >90          | 5       | 141   | 146   | Linear        | 0.93      | 1.9            | 110                      | 50    | 115  | 0.91                 | 0.995 | 0.980 | 1.010 | 0.53  |
| AHM non-users | Dementia/Mortality | All          | 7       | 4612  | 9515  | Non-linear    | 0.003     | -6.4           | 81                       | 75    | 86.5 | 0.01                 | 0.999 | 0.997 | 1.002 | 0.66  |
|               |                    | 60-70        | 5       | 635   | 2490  | Non-linear    | 0.01      | -6.6           | 83                       | 77    | 115  | 0.02                 | 0.996 | 0.988 | 1.005 | 0.38  |
|               |                    | 65-75        | 6       | 1640  | 4531  | Non-linear    | 0.003     | -7.1           | 82                       | 77    | 90   | 0.01                 | 0.997 | 0.991 | 1.002 | 0.19  |
|               |                    | 70-80        | 7       | 2405  | 5171  | Non-linear    | 0.047     | -4.5           | 82                       | 69    | 124  | 0.12                 | 1.000 | 0.995 | 1.004 | 0.89  |
|               |                    | 75-85        | 7       | 2115  | 3313  | Non-linear    | 0.03      | -4.1           | 85                       | 79    | 128  | 0.03                 | 0.998 | 0.994 | 1.003 | 0.49  |
|               |                    | 80-90        | 6       | 1287  | 1496  | Linear        | 0.34      | 1.4            | 91                       | 66    | 120  | 0.22                 | 0.998 | 0.992 | 1.003 | 0.40  |
|               |                    | 85-95        | 5       | 688   | 743   | Linear        | 0.23      | 2              | 81                       | 47    | 120  | 0.43                 | 0.997 | 0.990 | 1.004 | 0.35  |
|               |                    | >90          | 5       | 173   | 177   | Linear        | 0.12      | 0.9            | 79                       | 69    | 120  | 0.25                 | 0.989 | 0.975 | 1.003 | 0.13  |

**eTable 5. Relations for Diastolic Blood Pressure With Risk of Dementia, Mortality, and Dementia/Mortality in Age Groups, Stratified According to Antihypertensive Medication (AHM) Use.** Results are shown from non-linear and linear models. For each outcome, the optimal shape is given, with the p-value comparing the optimal non-linear model to the optimal linear model (i.e. p-non-linear value >0.05 denotes that the non-linear model was not significantly better than the linear model according to the log-likelihood ratio test). For linear models, the hazard ratio (HR) per mmHg increment, 95% confidence intervals (95%CI) and p-value for the linear association of DBP with the outcome are given. For non-linear models, the blood pressure associated with the lowest risk (LR) point estimated from the model is given, with 95%CI based on 1,000 bootstraps, and the p-value for the non-linear association of DBP with the outcome. Relations are shown for the complete population (overall) and within 10 year age subgroups.

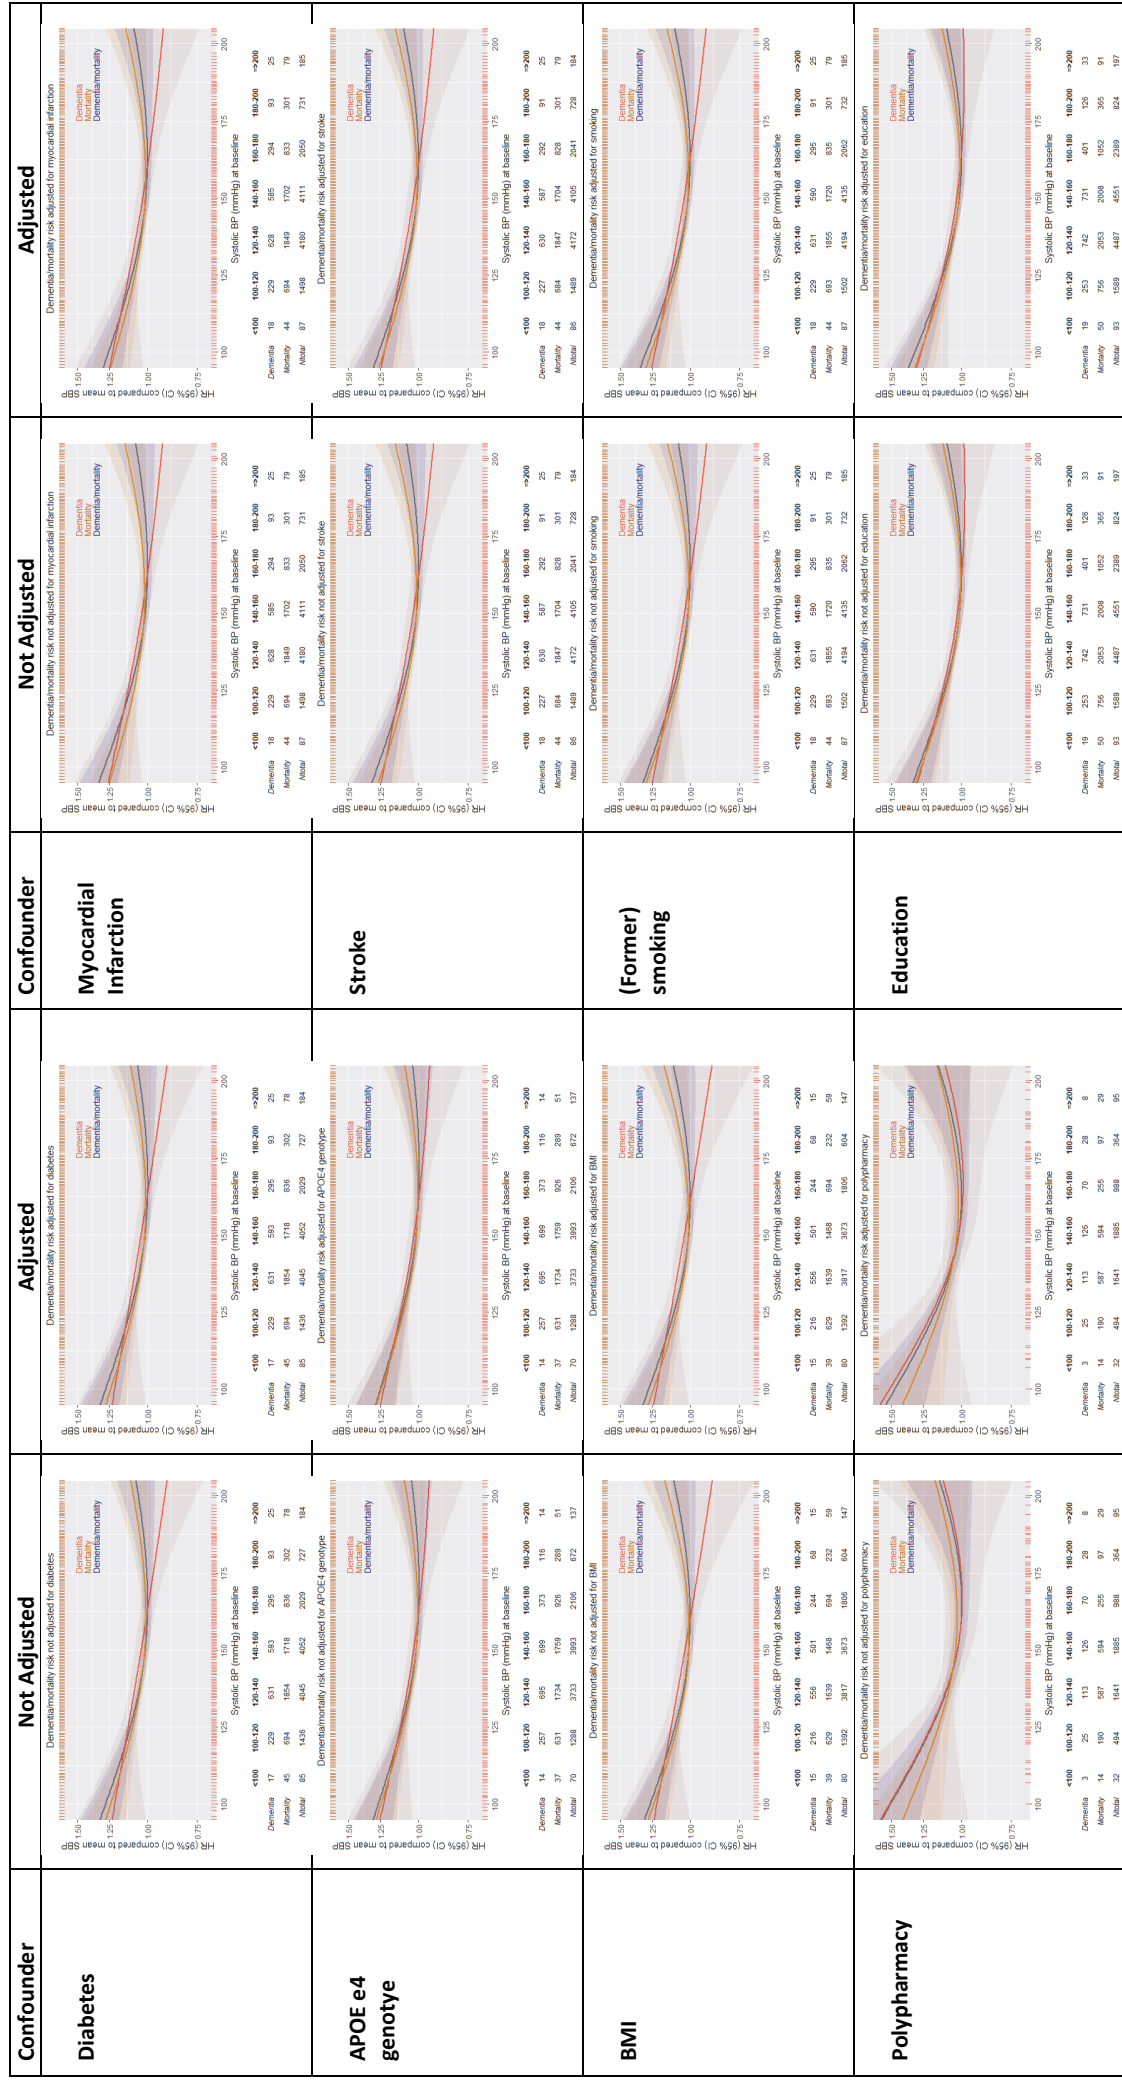

**Figure 4. Analyses of Systolic and Diastolic Blood Pressure and Dementia/Mortality Risk Adjusted and Not Adjusted for Potentially Relevant Confounders.** A. Systolic blood pressure. Depicted are results for optimal non-linear models. The 'Not Adjusted' figures show results of the main analyses without additional adjustment, in the subpopulation for which the confounding variable was available (i.e. not missing). The 'adjusted' figures show results of the main analyses (which were adjusted for sex and antihypertensive medication use) additionally adjusted for the individual tabulated confounders. The coloured lines represent the relative hazard ratio (HR) on the y-axis, according to blood pressure in mmHg on the x-axis. Shaded areas represent 95% confidence intervals. Orange vertical stripes (top) represent one or multiple mortality cases at that specific SBP, red vertical stripes (bottom) represent one or multiple dementia cases at that specific BP. "HR compared to mean SBP" denotes that the HR is 1.00 at the mean SBP. Models fitted using natural splines, with degrees of freedom selected from 1 (linear model) upto a maximum of 4 (knots at 25th, 50th and 75th percentile), based on optimal model fit according to the Akaike Information Criterion (AIC). Models are adjusted for sex and antihypertensive use.

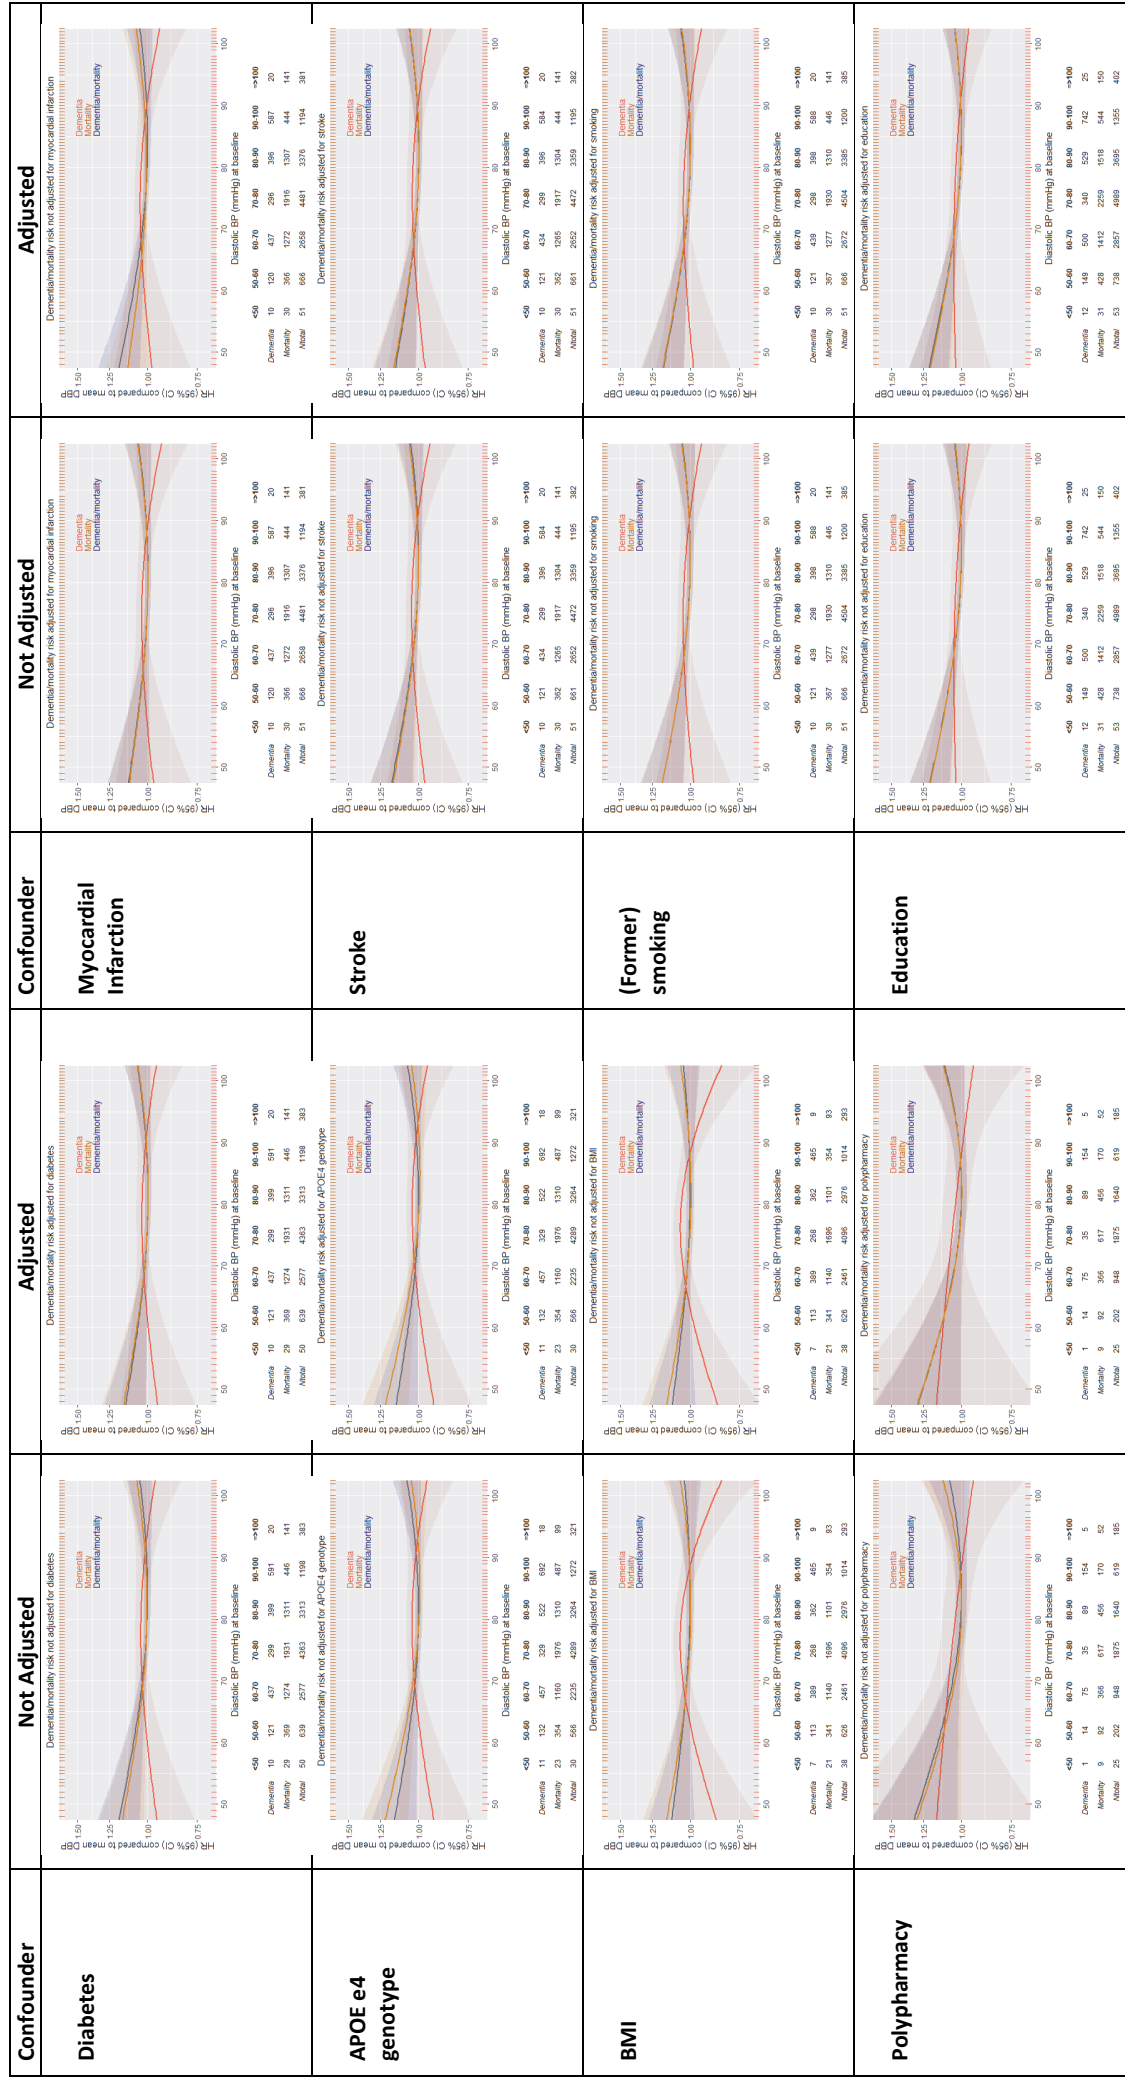

**Figure 4. Analyses of Systolic and Diastolic Blood Pressure and Dementia/Mortality Risk Adjusted and Not Adjusted for Potentially Relevant Confounders. B, Diastolic blood pressure.** Depicted are results for optimal non-linear models. The 'Not Adjusted' figures show results of the main analyses without additional adjustment, in the subpopulation for which the confounding variable was available (i.e. not missing). The 'adjusted' figures show results of the main analyses (which were adjusted for sex and antihypertensive medication use) additionally adjusted for the individual tabulated confounders. The coloured lines represent the relative hazard ratio (HR) on the y-axis, according to blood pressure in mmHg on the x-axis. Shaded areas represent 95% confidence intervals. Orange vertical stripes (bottom) represent one or multiple mortality cases at that specific DBP, red vertical stripes (top) represent one or multiple dementia cases at that specific BP. "HR compared to mean DBP" denotes that the HR is 1.00 at the mean DBP. Models fitted using natural splines, with degrees of freedom selected from 1 (linear model) upto a maximum of 4 (knots at 25<sub>th</sub>, 50<sub>th</sub> and 75<sub>th</sub> percentile), based on optimal model fit according to the Akaike Information Criterion (AIC). Models are adjusted for sex and antihypertensive use.

| Subgroup                                | Outcome            | Systolic BP    |         | Diastolic BP   |         |
|-----------------------------------------|--------------------|----------------|---------|----------------|---------|
|                                         |                    | AIC difference | P-value | AIC difference | P-value |
| <b>Sex</b>                              | Dementia/Mortality | 2.39           | 0.54    | 2.73           | 0.39    |
|                                         | Dementia           | 1.42           | 0.20    | 1.78           | 0.64    |
|                                         | Mortality          | 0.79           | 0.28    | 2.05           | 0.20    |
| <b>Antihypertensives</b>                | Dementia/Mortality | -5.12          | 0.01    | 1.39           | 0.27    |
|                                         | Dementia           | 1.40           | 0.27    | 3.61           | 0.82    |
|                                         | Mortality          | -2.24          | 0.04    | -302.20        | <0.001  |
| <b>Diabetes</b>                         | Dementia/Mortality | 5.38           | 0.07    | 6.18           | 0.04    |
|                                         | Dementia           | 1.45           | 0.45    | 1.93           | 0.78    |
|                                         | Mortality          | 6.52           | 0.03    | 5.82           | 0.05    |
| <b>History of myocardial infarction</b> | Dementia/Mortality | 7.64           | 0.02    | 3.48           | 0.22    |
|                                         | Dementia           | 2.27           | 0.41    | 1.13           | 0.35    |
|                                         | Mortality          | 6.17           | 0.04    | 3.57           | 0.20    |
| <b>History of stroke</b>                | Dementia/Mortality | 9.93           | <0.001  | 6.53           | 0.03    |
|                                         | Dementia           | -1.88          | 0.048   | 0.87           | 0.28    |
|                                         | Mortality          | 9.52           | 0.01    | 6.72           | 0.03    |
| <b>APOE e4 genotype</b>                 | Dementia/Mortality | 5.67           | 0.06    | 5.45           | 0.06    |
|                                         | Dementia           | 1.72           | 0.60    | 0.58           | 0.24    |
|                                         | Mortality          | 7.61           | 0.02    | 6.99           | 0.03    |
| <b>Polypharmacy</b>                     | Dementia/Mortality | 5.76           | 0.05    | 4.13           | 0.14    |
|                                         | Dementia           | 5.67           | 0.66    | 1.92           | 0.76    |
|                                         | Mortality          | 5.24           | 0.07    | 4.45           | 0.12    |

**eTable 6. Model Improvement Stratified According to Subgroups.** Akaike Information Criterion (AIC) difference denotes the improvement of the model including an interaction term blood pressure\*subgroup variable compared to a model adjusted for the subgroup variable. Comparisons include linear and non-linear models (i.e. the best fitting model was selected for each subgroup, which could be either linear or non-linear). Negative AIC denotes better and positive AIC worse model fit when stratified. P-value denotes significance of difference between models. Subgroups with a significantly ( $p<0.05$ ) better (i.e.  $AIC<0$ ) model fit were considered relevant modifiers of the relation between blood pressure and each outcome (bold and shaded in grey). BP: blood pressure.

| BP  | Outcome   | Subgroup  | Studies | Cases | Total | Optimal Shape | P-non-lin | AIC difference | Non-linear model results |       |      | Linear model results |       |       |       |      |
|-----|-----------|-----------|---------|-------|-------|---------------|-----------|----------------|--------------------------|-------|------|----------------------|-------|-------|-------|------|
|     |           |           |         |       |       |               |           |                | LR point                 | 95%CI | p    | HR                   | 95%CI | P     |       |      |
| SBP | Dementia  | Stroke    | 5       | 106   | 710   | Linear        | 0.78      | 1.9            | 100                      | 216   | 0.24 | 1.008                | 0.999 | 1.017 | 0.09  |      |
|     |           | No Stroke | 5       | 1764  | 12092 | Linear        | 0.92      | 2.0            | 229                      | 161   | 229  | 0.03                 | 0.997 | 0.995 | 0.999 | 0.01 |
|     | Mortality | Stroke    | 5       | 358   | 710   | Linear        | 0.45      | 1.5            | 158                      | 100   | 216  | 0.66                 | 0.999 | 0.993 | 1.004 | 0.60 |
|     |           | No Stroke | 5       | 5129  | 12088 | Non-linear    | 0.01      | -5.4           | 148                      | 136   | 158  | 0.03                 | 1.000 | 0.999 | 1.001 | 0.84 |
|     | Dem/mort  | Stroke    | 5       | 392   | 710   | Linear        | 0.62      | 1.8            | 153                      | 100   | 216  | 0.88                 | 1.000 | 0.995 | 1.005 | 0.99 |
|     |           | No Stroke | 5       | 5600  | 12090 | Non-linear    | 0.01      | -5.6           | 154                      | 144   | 170  | 0.01                 | 0.999 | 0.998 | 1.001 | 0.27 |
| DBP | Dementia  | Stroke    | 5       | 105   | 708   | Linear        | 0.3       | 1.0            | 75                       | 40    | 131  | 0.49                 | 1.008 | 0.999 | 1.017 | 0.09 |
|     |           | No Stroke | 5       | 1761  | 12090 | Linear        | 0.41      | 1.3            | 143                      | 45    | 143  | 0.54                 | 0.997 | 0.995 | 0.999 | 0.01 |
|     | Mortality | Stroke    | 5       | 355   | 708   | Linear        | 0.72      | 1.8            | 82                       | 40    | 131  | 0.92                 | 0.999 | 0.993 | 1.004 | 0.60 |
|     |           | No Stroke | 5       | 5125  | 12086 | Non-linear    | 0.004     | -6.1           | 80                       | 72    | 89   | 0.02                 | 1.000 | 0.999 | 1.001 | 0.84 |
|     | Dem/mort  | Stroke    | 5       | 389   | 708   | Linear        | 0.77      | 1.9            | 76                       | 40    | 131  | 0.92                 | 1.000 | 0.995 | 1.005 | 0.99 |
|     |           | No Stroke | 5       | 5595  | 12088 | Non-linear    | 0.01      | -5.3           | 81                       | 73    | 89   | 0.03                 | 0.999 | 0.998 | 1.001 | 0.27 |

**eTable 7. Subgroup Analyses in Individuals With/Without a History of Stroke.** Results are shown from non-linear and linear models. For each outcome, the optimal shape is given, with the p-value comparing the optimal non-linear model to the optimal linear model (i.e. a p-non-linear value >0.05 denotes that the non-linear model was not significantly better than the linear model according to the log-likelihood ratio test). For linear models, the hazard ratio (HR) per mmHg increment, 95% confidence intervals (95%CI) and p-value for the linear association of DBP/SBP with the outcome are given. For non-linear models, the blood pressure associated with the lowest risk (LR) point estimated from the model is given, with 95%CI based on 1,000 bootstraps, and the p-value for the non-linear association of DBP/SBP with the outcome. Relations are shown for the complete population (overall) and within 10 year age subgroups. BP: blood pressure, SBP: systolic blood pressure, DBP: diastolic blood pressure

| Outcome                | Excluding | Studies | Cases | Total | Optimal Shape | P-non-lin | AIC Difference | Non-linear model results |       |     | Linear model results |       |       |       |        |
|------------------------|-----------|---------|-------|-------|---------------|-----------|----------------|--------------------------|-------|-----|----------------------|-------|-------|-------|--------|
|                        |           |         |       |       |               |           |                | LR point                 | 95%CI | p   | HR                   | 95%CI | P     |       |        |
| Dementia               | ACT       | 6       | 1491  | 11442 | Non-linear    | 0.004     | -32            | 167                      | 157   | 219 | 0.001                | 0.997 | 0.995 | 1.000 | 0.02   |
|                        | Got       | 6       | 2660  | 15893 | Linear        | 0.19      | 0.3            | 193                      | 162   | 230 | 0.001                | 0.997 | 0.995 | 0.998 | <0.001 |
|                        | KP        | 6       | 2310  | 15607 | Linear        | 0.37      | 1.2            | 230                      | 167   | 230 | 0.001                | 0.996 | 0.994 | 0.998 | <0.001 |
|                        | LEILA     | 6       | 2533  | 15973 | Linear        | 0.27      | 0.8            | 206                      | 162   | 225 | 0.002                | 0.997 | 0.995 | 0.999 | 0.001  |
|                        | PreDIVA   | 6       | 2507  | 13433 | Non-linear    | 0.13      | -1.5           | 182                      | 158   | 230 | 0.004                | 0.997 | 0.995 | 0.999 | 0.004  |
|                        | SNAC      | 6       | 2316  | 14216 | Linear        | 0.45      | 1.4            | 195                      | 157   | 230 | 0.09                 | 0.998 | 0.996 | 1.000 | 0.04   |
| Mortality              | ZARADEMP  | 6       | 2613  | 14684 | Linear        | 0.35      | 1.1            | 221                      | 164   | 230 | 0.01                 | 0.997 | 0.995 | 0.999 | 0.002  |
|                        | ACT       | 6       | 4696  | 11438 | Non-linear    | <0.001    | -10.7          | 166                      | 158   | 194 | <0.001               | 0.998 | 0.996 | 0.999 | 0.001  |
|                        | Got       | 6       | 7184  | 15889 | Non-linear    | 0.005     | -6.0           | 162                      | 153   | 203 | 0.001                | 0.999 | 0.997 | 1.000 | 0.01   |
|                        | KP        | 6       | 6845  | 15603 | Non-linear    | 0.001     | -9.4           | 160                      | 152   | 177 | <0.001               | 0.998 | 0.997 | 1.000 | 0.009  |
|                        | LEILA     | 6       | 7215  | 15969 | Non-linear    | <0.001    | -10.1          | 158                      | 152   | 174 | <0.001               | 0.999 | 0.997 | 1.000 | 0.02   |
|                        | PreDIVA   | 6       | 7153  | 13433 | Non-linear    | <0.001    | -11.9          | 157                      | 150   | 169 | <0.001               | 0.999 | 0.998 | 1.000 | 0.04   |
| Dementia/<br>Mortality | SNAC      | 6       | 6406  | 14212 | Non-linear    | 0.002     | -7.6           | 159                      | 151   | 176 | 0.001                | 0.999 | 0.998 | 1.000 | 0.053  |
|                        | ZARADEMP  | 6       | 6699  | 14680 | Non-linear    | 0.001     | -9.2           | 163                      | 155   | 189 | <0.001               | 0.998 | 0.997 | 0.999 | 0.004  |
|                        | ACT       | 6       | 5144  | 11440 | Non-linear    | <0.001    | -11.9          | 167                      | 160   | 184 | <0.001               | 0.997 | 0.996 | 0.999 | <0.001 |
|                        | Got       | 6       | 7852  | 15891 | Non-linear    | 0.004     | -6.2           | 168                      | 158   | 219 | <0.001               | 0.998 | 0.997 | 0.999 | <0.001 |
|                        | KP        | 6       | 7388  | 15605 | Non-linear    | 0.002     | -7.5           | 165                      | 156   | 203 | <0.001               | 0.998 | 0.997 | 0.999 | <0.001 |
|                        | LEILA     | 6       | 7818  | 15971 | Non-linear    | 0.001     | -9.2           | 162                      | 154   | 185 | <0.001               | 0.998 | 0.997 | 0.999 | <0.001 |
| PreDIVA                | PreDIVA   | 6       | 7645  | 13433 | Non-linear    | <0.001    | -11.4          | 160                      | 153   | 177 | <0.001               | 0.998 | 0.997 | 0.999 | 0.003  |
|                        | SNAC      | 6       | 7050  | 14214 | Non-linear    | 0.001     | -9.1           | 162                      | 153   | 182 | <0.001               | 0.998 | 0.997 | 0.999 | 0.003  |
|                        | ZARADEMP  | 6       | 7363  | 14682 | Non-linear    | 0.002     | -7.3           | 167                      | 158   | 205 | <0.001               | 0.998 | 0.997 | 0.999 | <0.001 |

**Table 8. Leave-One-Out Analyses.** A, Systolic blood pressure. Overall analyses results when leaving out the individual study populations listed one at a time. Results are shown from non-linear and linear models. For each outcome, the optimal shape is given, with the p-value comparing the optimal non-linear model to the optimal linear model (i.e. a p-non-linear value >0.05 denotes that the non-linear model was not significantly better than the linear model according to the log-likelihood ratio test). For linear models, the hazard ratio (HR) per mmHg increment, 95% confidence intervals (95%CI) and p-value for the linear association of SBP with the outcome are given. For non-linear models, the blood pressure associated with the lowest risk (LR) point estimated from the model is given, with 95%CI based on 1,000 bootstraps, and the p-value for the non-linear association of SBP with the outcome. Relations are shown for the complete population (overall) and within 10 year age subgroups. BP: blood pressure, SBP: systolic blood pressure



| Outcome                | Excluding | Studies | Cases | Total | Optimal Shape | P-non-lin | AIC Difference | Non-linear model results |       |     | Linear model results |       |       |       |      |
|------------------------|-----------|---------|-------|-------|---------------|-----------|----------------|--------------------------|-------|-----|----------------------|-------|-------|-------|------|
|                        |           |         |       |       |               |           |                | LR point                 | 95%CI | p   | HR                   | 95%CI | P     |       |      |
| Dementia               | ACT       | 6       | 1484  | 11410 | Linear        | 0.29      | 0.9            | 103                      | 86    | 150 | 0.06                 | 0.995 | 0.99  | 1.000 | 0.04 |
|                        | Got       | 6       | 2651  | 15853 | Linear        | 0.48      | 1.5            | 139                      | 74    | 139 | 0.28                 | 0.997 | 0.994 | 1.001 | 0.15 |
|                        | KP        | 6       | 2304  | 15571 | Linear        | 0.39      | 1.2            | 139                      | 78    | 139 | 0.35                 | 0.998 | 0.994 | 1.002 | 0.25 |
|                        | LEILA     | 6       | 2528  | 15936 | Linear        | 0.22      | 0.5            | 120                      | 45    | 120 | 0.23                 | 0.998 | 0.994 | 1.002 | 0.24 |
|                        | PD        | 6       | 2498  | 13392 | Linear        | 0.57      | 1.6            | 143                      | 76    | 143 | 0.39                 | 0.998 | 0.994 | 1.001 | 0.21 |
|                        | SNAC      | 6       | 2307  | 14175 | Linear        | 0.47      | 1.5            | 141                      | 45    | 141 | 0.53                 | 0.998 | 0.994 | 1.002 | 0.39 |
| Mortality              | ZARADEMP  | 6       | 2604  | 14647 | Linear        | 0.48      | 1.5            | 141                      | 45    | 141 | 0.53                 | 0.998 | 0.995 | 1.002 | 0.38 |
|                        | ACT       | 6       | 4673  | 11406 | Non-linear    | 0.001     | -8.5           | 90                       | 84    | 102 | <0.001               | 0.997 | 0.994 | 1.000 | 0.02 |
|                        | Got       | 6       | 7153  | 15849 | Non-linear    | 0.01      | -5.5           | 85                       | 80    | 104 | 0.01                 | 0.998 | 0.996 | 1.000 | 0.13 |
|                        | KP        | 6       | 6818  | 15567 | Non-linear    | 0.003     | -6.6           | 85                       | 80    | 108 | 0.003                | 0.998 | 0.996 | 1.000 | 0.09 |
|                        | LEILA     | 6       | 7187  | 15932 | Non-linear    | 0.01      | -5.1           | 83                       | 78    | 96  | 0.01                 | 0.998 | 0.996 | 1.001 | 0.16 |
|                        | PD        | 6       | 7122  | 13392 | Non-linear    | 0.01      | -5.6           | 84                       | 79    | 99  | 0.01                 | 0.998 | 0.996 | 1.001 | 0.14 |
| Dementia/<br>Mortality | SNAC      | 6       | 6374  | 14171 | Non-linear    | 0.03      | -2.5           | 86                       | 78    | 139 | 0.04                 | 0.998 | 0.996 | 1.001 | 0.14 |
|                        | ZARADEMP  | 6       | 6670  | 14643 | Non-linear    | 0.004     | -6.2           | 87                       | 81    | 114 | 0.001                | 0.997 | 0.995 | 1.000 | 0.02 |
|                        | ACT       | 6       | 5119  | 11408 | Non-linear    | 0.002     | -7.9           | 86                       | 82    | 95  | 0.003                | 0.998 | 0.996 | 1.001 | 0.20 |
|                        | Got       | 6       | 7820  | 15851 | Non-linear    | 0.01      | -5.0           | 83                       | 77    | 96  | 0.02                 | 0.999 | 0.997 | 1.001 | 0.38 |
|                        | KP        | 6       | 7360  | 15569 | Non-linear    | 0.01      | -5.2           | 82                       | 76    | 93  | 0.02                 | 0.999 | 0.997 | 1.002 | 0.56 |
|                        | LEILA     | 6       | 7790  | 15934 | Non-linear    | 0.04      | -2.1           | 85                       | 77    | 120 | 0.08                 | 0.999 | 0.997 | 1.001 | 0.37 |
| Dementia/<br>Mortality | PD        | 6       | 7613  | 13392 | Non-linear    | 0.01      | -5.1           | 82                       | 75    | 93  | 0.02                 | 0.999 | 0.997 | 1.002 | 0.57 |
|                        | SNAC      | 6       | 7017  | 14173 | Non-linear    | 0.02      | -3.1           | 86                       | 80    | 139 | 0.02                 | 0.998 | 0.996 | 1.000 | 0.12 |
|                        | ZARADEMP  | 6       | 7333  | 14645 | Non-linear    | 0.01      | -5.0           | 84                       | 79    | 100 | 0.02                 | 0.999 | 0.997 | 1.001 | 0.24 |

**Table 8. Leave-One-Out Analyses.** B. Diastolic blood pressure. Overall analyses results when leaving out the individual study populations listed one at a time. Results are shown from non-linear and linear models. For each outcome, the optimal shape is given, with the p-value comparing the optimal non-linear model to the optimal linear model (i.e. a p-non-linear value >0.05 denotes that the non-linear model was not significantly better than the linear model according to the log-likelihood ratio test). For linear models, the hazard ratio (HR) per mmHg increment, 95% confidence intervals (95%CI) and p-value for the linear association of DBP with the outcome are given. For non-linear models, the blood pressure associated with the lowest risk (LR) point estimated from the model is given, with 95%CI based on 1,000 bootstraps, and the p-value for the non-linear association of DBP with the outcome. Relations are shown for the complete population (overall) and within 10 year age subgroups. BP: blood pressure, DBP: diastolic blood pressure

| BP  | Time to event | Outcome   | Studies | Cases | Total | Optimal shape | p-non-linear | AIC difference | LR  | 95% CI | p-val | HR     | 95%CI | P     | HR    |        |
|-----|---------------|-----------|---------|-------|-------|---------------|--------------|----------------|-----|--------|-------|--------|-------|-------|-------|--------|
| SBP | <5 years      | Dementia  | 7       | 932   | 16873 | Non-linear    | 0.004        | -6.2           | 160 | 150    | 200   | 0.01   | 0.998 | 0.995 | 1.001 | 0.25   |
|     |               | Mortality | 7       | 2161  | 16869 | Non-linear    | <0.001       | -13.1          | 169 | 160    | 200   | <0.001 | 0.995 | 0.993 | 0.997 | <0.001 |
|     |               | Dem/Mort  | 7       | 2745  | 16870 | Non-linear    | <0.001       | -17.6          | 166 | 159    | 185   | <0.001 | 0.996 | 0.994 | 0.998 | <0.001 |
|     | 5-10 years    | Dementia  | 7       | 962   | 12821 | Linear        | 0.82         | 2.0            | 225 | 162    | 225   | 0.03   | 0.996 | 0.993 | 0.999 | 0.01   |
|     |               | Mortality | 7       | 2420  | 12819 | Non-linear    | 0.09         | -1.0           | 161 | 145    | 225   | 0.06   | 0.998 | 0.996 | 1.000 | 0.10   |
|     |               | Dem/Mort  | 7       | 2819  | 12820 | Non-linear    | 0.11         | -0.7           | 166 | 152    | 225   | 0.02   | 0.998 | 0.996 | 1.000 | 0.02   |
|     | >10 years     | Dementia  | 6       | 842   | 4869  | Linear        | 0.21         | 0.3            | 218 | 214    | 218   | 0.01   | 0.995 | 0.992 | 0.999 | 0.01   |
|     |               | Mortality | 6       | 2448  | 4869  | Linear        | 0.19         | 0.3            | 143 | 91     | 214   | 0.36   | 1.001 | 0.999 | 1.003 | 0.60   |
|     |               | Dem/Mort  | 6       | 2597  | 4869  | Non-linear    | 0.14         | -0.2           | 153 | 92     | 218   | 0.24   | 0.999 | 0.997 | 1.001 | 0.41   |
| DBP | <5 years      | Dementia  | 7       | 933   | 16860 | Linear        | 0.62         | 1.7            | 131 | 83     | 139   | 0.20   | 0.998 | 0.995 | 1.001 | 0.25   |
|     |               | Mortality | 7       | 2154  | 16856 | Non-linear    | 0.001        | -9.8           | 91  | 85     | 114   | <0.001 | 0.995 | 0.993 | 0.997 | <0.001 |
|     |               | Dem/Mort  | 7       | 2737  | 16857 | Non-linear    | 0.002        | -7.8           | 93  | 87     | 139   | <0.001 | 0.996 | 0.994 | 0.998 | <0.001 |
|     | 5-10 years    | Dementia  | 7       | 961   | 12820 | Linear        | 0.85         | 2.0            | 100 | 45     | 125   | 0.74   | 0.996 | 0.993 | 0.999 | 0.01   |
|     |               | Mortality | 7       | 2417  | 12818 | Linear        | 0.61         | 1.7            | 84  | 45     | 125   | 0.82   | 0.998 | 0.996 | 1.000 | 0.10   |
|     |               | Dem/Mort  | 7       | 2814  | 12819 | Linear        | 0.42         | 1.3            | 82  | 45     | 125   | 0.71   | 0.998 | 0.996 | 1.000 | 0.02   |
|     | >10 years     | Dementia  | 6       | 841   | 4869  | Non-linear    | 0.07         | -1.4           | 120 | 45     | 120   | 0.13   | 0.995 | 0.992 | 0.999 | 0.01   |
|     |               | Mortality | 6       | 2445  | 4869  | Linear        | 0.71         | 1.9            | 45  | 45     | 67    | <0.001 | 1.001 | 0.999 | 1.003 | 0.60   |
|     |               | Dem/Mort  | 6       | 2594  | 4869  | Linear        | 0.91         | 2.0            | 45  | 45     | 56    | <0.001 | 0.999 | 0.997 | 1.001 | 0.41   |

**Table 9. Relations for Systolic and Diastolic Blood Pressure With Risk of Dementia, Mortality, and Dementia/Mortality According to Time to Event in the Total Population.** Relations between systolic and diastolic blood pressure and risk of events occurring in the listed follow-up time windows. Time windows (<5 years, 5-10 years, >10 years) were based on tertiles of dementia events across follow-up time. Results are shown from non-linear and linear models in age-based subgroups. For each outcome, the optimal shape is given, with the p-value comparing the optimal non-linear model to the optimal linear model (i.e. a p-non-linear value >0.05 denotes that the non-linear model was not significantly better than the linear model according to the log-likelihood ratio test). For linear models, the hazard ratio (HR) per mmHg increment, 95% confidence intervals (95%CI) and p-value for the linear association of SBP with the outcome are given. For non-linear models, the blood pressure associated with the lowest risk (LR) point estimated from the model is given, with 95%CI based on 1,000 bootstraps, and the p-value for the non-linear association of SBP with the outcome. Relations are shown for the complete population (overall) and within 10 year age subgroups. BP: blood pressure, SBP: systolic blood pressure, DBP: diastolic blood pressure



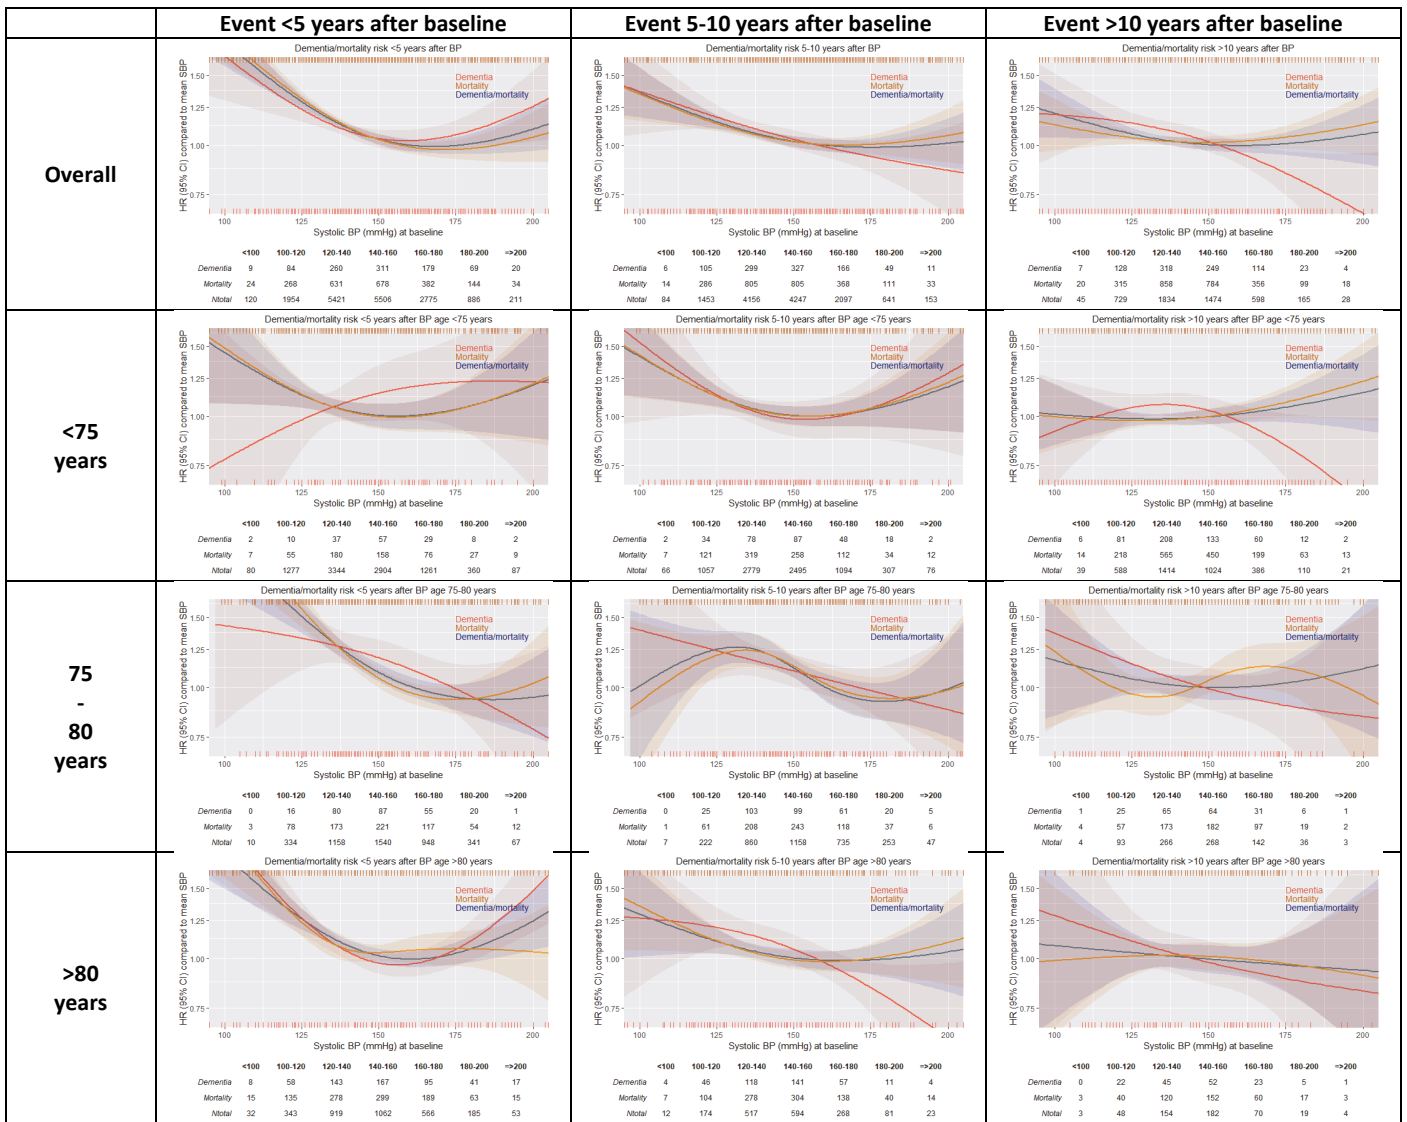

**Figure 5. Analyses for Systolic Blood Pressure According to Time to Event in the Total Population and Within Age Subgroups.** Depicted are results for optimal non-linear models on relations between systolic blood pressure and risk of events occurring in the listed follow-up time windows, and for the listed age categories. Time windows (<5 years, 5-10 years, >10 years) and age categories (<75, 75-80, >80 years) were based on tertiles of dementia events across follow-up time and across baseline age. For age categories, the age window was increased by steps of 2.5 years to avoid abrupt changes in the study population influencing results, analogous to the overall age stratified analyses.

**eTable 10. Sensitivity Analyses Adjusting for Multiple Confounders in Together in Single Models**

| Study       | n    | Sex | AHM | BMI  | DM   | Smoking | Stroke | MI   | N med | Edu  | APOE |
|-------------|------|-----|-----|------|------|---------|--------|------|-------|------|------|
| ZARADEMP    | 2189 | 0   | 0   | 410  | 15   | 1       | 49     | 31   | 0     | 12   | 2189 |
| Kungsholmen | 1275 | 0   | 0   | 1275 | 1275 | 1275    | 1275   | 1275 | 1275  | 0    | 306  |
| SNAC-K.     | 2657 | 0   | 0   | 2657 | 2657 | 2657    | 2657   | 2657 | 2657  | 2657 | 152  |
| LEILA       | 891  | 0   | 0   | 891  | 1    | 5       | 1      | 4    | 891   | 19   | 647  |
| H70         | 980  | 0   | 0   | 17   | 0    | 18      | 27     | 0    | 487   | 20   | 35   |
| PreDIVA     | 3449 | 0   | 0   | 2    | 0    | 7       | 44     | 23   | 632   | 34   | 546  |
| ACT         | 5432 | 0   | 0   | 102  | 367  | 13      | 15     | 41   | 5432  | 1    | 999  |

**A, Missing confounders per study.** N denotes the total number of participants, the number under each confounder listed the number of individuals with missing data. Abbreviation: AHM: antihypertensive medication, BMI: Body Mass Index, DM: diabetes, MI: Myocardial infarction history, N med: number of medication, Edu: education, APOE: APOE-genotype

| Method            | Outcome   | Studies | Cases | Total | Optimal shape | P-non-lin | AIC difference | LR  | 95%CI | p   | HR     | 95%CI | p     |       |        |
|-------------------|-----------|---------|-------|-------|---------------|-----------|----------------|-----|-------|-----|--------|-------|-------|-------|--------|
| <b>Original</b>   | Dem       | 7       | 2738  | 16873 | Linear        | 0.16      | 0.1            | 185 | 161   | 230 | 0.001  | 0.997 | 0.995 | 0.999 | 0.001  |
| <b>Analyses</b>   | Mortality | 7       | 7698  | 16869 | Non-linear    | <0.001    | -10.4          | 160 | 154   | 181 | <0.001 | 0.998 | 0.997 | 1.000 | 0.008  |
|                   | Dem/Mort  | 7       | 8375  | 16871 | Non-linear    | <0.001    | -10.2          | 163 | 158   | 197 | <0.001 | 0.998 | 0.997 | 0.999 | <0.001 |
| <b>Minimal</b>    | Dem       | 5       | 1843  | 12247 | Linear        | 0.58      | 1.7            | 230 | 178   | 230 | 0.01   | 0.997 | 0.995 | 0.999 | 0.01   |
| <b>Dataset</b>    | Mortality | 5       | 5399  | 12243 | Non-linear    | 0.004     | -6.3           | 151 | 147   | 184 | 0.01   | 1.000 | 0.998 | 1.001 | 0.51   |
|                   | Dem/Mort  | 5       | 5893  | 12245 | Non-linear    | 0.003     | -7.1           | 159 | 149   | 168 | 0.002  | 0.999 | 0.998 | 1.000 | 0.06   |
| <b>'Unknown'</b>  | Dementia  | 7       | 2738  | 16873 | Linear        | 0.2       | 0.4            | 230 | 185   | 230 | 0.001  | 0.997 | 0.995 | 0.999 | 0.001  |
| <b>Category</b>   | Mortality | 7       | 7698  | 16869 | Non-linear    | 0.002     | -7             | 161 | 156   | 170 | 0.001  | 0.999 | 0.998 | 1.000 | 0.04   |
|                   | Dem/Mort  | 7       | 8375  | 16871 | Non-linear    | 0.002     | -7.2           | 159 | 149   | 168 | <0.001 | 0.998 | 0.997 | 0.999 | 0.001  |
| <b>Propensity</b> | Dementia  | 7       | 2738  | 16873 | Linear        | 0.18      | 0.3            | 230 | 161   | 230 | 0.003  | 0.997 | 0.995 | 0.999 | 0.003  |
| <b>Score</b>      | Mortality | 7       | 7698  | 16869 | Non-linear    | 0.001     | -8.2           | 154 | 149   | 159 | 0.002  | 0.999 | 0.998 | 1.000 | 0.12   |
|                   | Dem/Mort  | 7       | 8375  | 16871 | Non-linear    | 0.001     | -8.3           | 163 | 161   | 176 | <0.001 | 0.999 | 0.997 | 1.000 | 0.01   |

**B, Results for systolic blood pressure models adjusted for multiple additional confounders using different methods for handling missing data.** *Original analyses:* main analyses in the paper, adjusted for age, sex and antihypertensive use only. *Minimal dataset:* additionally adjusted for age, sex, antihypertensive use, diabetes mellitus, smoking, history of myocardial infarction, history of stroke, and education (tertiles of levels within study). Missing values left out of analyses (pairwise), these analyses exclude the Kungsholmen and SNAC-K studies completely. *'Unknown' category:* additionally adjusted for BMI (<25, 25-30, 30+), number of medications used, and APOE-genotype. *Propensity score:* analyses adjusted for a propensity score handling missing data using missing pattern approach, comprising the relation between confounders and systolic BP levels, specifically calculated for each missing data pattern in the confounders.

| Method                    | Outcome   | Studies | Cases | Total | Optimal shape | P-non-lin | AIC difference | LR  | 95%CI | p   | HR    | 95%CI | p     |       |
|---------------------------|-----------|---------|-------|-------|---------------|-----------|----------------|-----|-------|-----|-------|-------|-------|-------|
| <b>Original analyses</b>  | Dem       | 7       | 2735  | 16860 | Linear        | 0.57      | 1.7            | 139 | 80    | 139 | 0.997 | 0.994 | 1.001 | 0.16  |
|                           | Mortality | 7       | 7683  | 16856 | Non-linear    | 0.002     | -7.5           | 84  | 80    | 97  | 0.998 | 0.996 | 1.000 | 0.063 |
|                           | Dem/Mort  | 7       | 8359  | 16858 | Non-linear    | 0.004     | -6.3           | 82  | 79    | 93  | 0.999 | 0.997 | 1.001 | 0.30  |
| <b>Minimal dataset</b>    | Dem       | 5       | 1840  | 12235 | Linear        | 0.37      | 1.1            | 139 | 45    | 139 | 0.999 | 0.995 | 1.003 | 0.70  |
|                           | Mortality | 5       | 5388  | 12231 | Non-linear    | 0.06      | -1.6           | 73  | 45    | 83  | 1.002 | 0.999 | 1.005 | 0.12  |
|                           | Dem/Mort  | 5       | 5882  | 12233 | Non-linear    | 0.047     | -1.9           | 74  | 45    | 82  | 1.002 | 0.999 | 1.004 | 0.14  |
| <b>'Unknown' category</b> | Dementia  | 7       | 2735  | 16860 | Linear        | 0.41      | 1.3            | 139 | 45    | 139 | 0.998 | 0.995 | 1.002 | 0.34  |
|                           | Mortality | 7       | 7683  | 16856 | Non-linear    | 0.02      | -3.1           | 80  | 66    | 94  | 1     | 0.998 | 1.002 | 0.81  |
|                           | Dem/Mort  | 7       | 8359  | 16858 | Non-linear    | 0.03      | -2.5           | 74  | 45    | 82  | 1.001 | 0.999 | 1.003 | 0.38  |
| <b>Propensity score</b>   | Dementia  | 7       | 2735  | 16860 | Linear        | 0.57      | 1.7            | 139 | 45    | 139 | 0.998 | 0.994 | 1.001 | 0.24  |
|                           | Mortality | 7       | 7683  | 16856 | Non-linear    | 0.002     | -7.8           | 82  | 76    | 89  | 0.999 | 0.997 | 1.002 | 0.59  |
|                           | Dem/Mort  | 7       | 8359  | 16858 | Non-linear    | 0.01      | -5.8           | 80  | 72    | 87  | 1     | 0.998 | 1.002 | 0.94  |

**C, Results for diastolic blood pressure models adjusted for multiple additional confounders using different methods for handling missing data.** *Original analyses:* main analyses in the paper, adjusted for age, sex and antihypertensive use only. *Minimal dataset:* additionally adjusted for age, sex, antihypertensive use, diabetes mellitus, smoking, history of myocardial infarction, history of stroke, and education (tertiles of levels within study). Missing values left out of analyses (pairwise), these analyses exclude the Kungsholmen and SNAC-K studies completely. *'Unknown' category:* additionally adjusted for BMI (<25, 25-30, 30+), number of medications used, and APOE-genotype. *Propensity score:* analyses adjusted for a propensity score handling missing data using missing pattern approach, comprising the relation between confounders and diastolic BP levels, specifically calculated for each missing data pattern in the confounders.

| Blood pressure | Baseline |      | Optimal |            |            |          | AIC   |     | Non-linear model results |       |       | Linear model results |       |       |       |
|----------------|----------|------|---------|------------|------------|----------|-------|-----|--------------------------|-------|-------|----------------------|-------|-------|-------|
|                | Age      |      | Shape   | P-non-lin  | Difference | LR point | 95%CI | p   | HR                       | 95%CI | P     |                      |       |       |       |
| Systolic       | All      | 7    | 2,738   | 16,873     | Linear     | 0.33     | 1.05  | 195 | 158                      | 230   | 0.03  | 0.998                | 0.996 | 1.000 | 0.015 |
|                | 60-70    | 5    | 231     | 3813       | Linear     | 0.89     | 1.99  | 260 | 157                      | 260   | 0.22  | 0.998                | 0.997 | 1.000 | 0.08  |
|                | 65-75    | 6    | 786     | 7656       | Linear     | 0.57     | 1.68  | 230 | 86                       | 230   | 0.75  | 0.999                | 0.996 | 1.003 | 0.60  |
|                | 70-80    | 7    | 1352    | 9602       | Linear     | 0.40     | 1.29  | 260 | 179                      | 260   | 0.09  | 0.997                | 0.995 | 1.000 | 0.047 |
|                | 75-85    | 7    | 1390    | 6449       | Linear     | 0.27     | 0.79  | 197 | 163                      | 260   | 0.008 | 0.996                | 0.994 | 0.999 | 0.004 |
|                | 80-90    | 7    | 947     | 2922       | Non-linear | 0.001    | -9.14 | 160 | 153                      | 189   | 0.001 | 0.997                | 0.994 | 1.001 | 0.10  |
|                | 85-95    | 5    | 535     | 1504       | Non-linear | 0.005    | -5.94 | 162 | 152                      | 195   | 0.004 | 0.997                | 0.993 | 1.001 | 0.11  |
|                | >90      | 5    | 121     | 345        | Linear     | 0.72     | 1.82  | 231 | 79                       | 231   | 0.76  | 0.999                | 0.991 | 1.007 | 0.73  |
|                | All      | 7    | 2735    | 16860      | Linear     | 0.99     | 2.00  | 139 | 91                       | 139   | 0.01  | 0.995                | 0.991 | 0.998 | 0.003 |
|                | 60-70    | 5    | 231     | 3811       | Linear     | 0.21     | 0.60  | 130 | 115                      | 130   | 0.16  | 0.989                | 0.976 | 1.003 | 0.12  |
| 65-75          | 6        | 786  | 7651    | Linear     | 0.31       | 0.97     | 130   | 27  | 130                      | 0.16  | 0.994 | 0.988                | 1.001 | 0.11  |       |
| 70-80          | 7        | 1351 | 9598    | Linear     | 0.27       | 0.76     | 130   | 114 | 139                      | 0.14  | 0.996 | 0.991                | 1.001 | 0.11  |       |
| 75-85          | 7        | 1386 | 6442    | Linear     | 0.55       | 1.07     | 130   | 108 | 139                      | 0.06  | 0.995 | 0.990                | 0.999 | 0.03  |       |
| 80-90          | 7        | 944  | 2914    | Non-linear | 0.07       | -0.54    | 105   | 87  | 139                      | 0.03  | 0.994 | 0.989                | 1.000 | 0.04  |       |
| 85-95          | 5        | 535  | 1503    | Non-linear | 0.12       | -0.99    | 93    | 74  | 173                      | 0.13  | 0.997 | 0.990                | 1.004 | 0.37  |       |
| >90            | 5        | 121  | 345     | Linear     | 0.92       | 1.97     | 30    | 30  | 120                      | 0.96  | 1.002 | 0.987                | 1.018 | 0.79  |       |

**Table 11. Results for Fine-Gray Analyses of Dementia Accounting for the Competing Risk of Mortality in the Overall Population and Baseline Age Groups.** Results of the main analyses for systolic blood pressure and diastolic blood pressure on the outcome of dementia, accounting for mortality as competing risk. Results are shown from non-linear and linear models overall and in age-based subgroups. For each outcome, the optimal shape is given, with the p-value comparing the optimal non-linear model to the optimal linear model (i.e. p-non-linear value >0.05 denotes that the non-linear model was not significantly better than the linear model according to the log-likelihood ratio test). For linear models, the hazard ratio (HR) per mmHg increment, 95% confidence intervals (95%CI) and p-value for the linear association of SBP with the outcome are given. For non-linear models, the blood pressure associated with the lowest risk (LR) point estimated from the model is given, with 95%CI based on 1,000 bootstraps, and the p-value for the non-linear association of SBP with the outcome. Relations are shown for the complete population (overall) and within 10 year age subgroups.
